# Supplementary material for: Longitudinal relationships between changes in body composition and changes in selected metabolic risk factors (abdominal obesity and blood pressure) among South African adolescents
Source: PeerJ. 2020 Jun 23;8:e9331. doi: 10.7717/peerj.9331 (PMC7319020; doi:10.7717/peerj.9331)
Supplement: Supplemental Information 1 [file peerj-08-9331-s001.xlsx]

## Sheet: PAHLS Longitudinal data-Vincent
ID	Age	Gender1Male2Female	Race1black2white3coloured4indian	Stature1	BodyMass1	BMI1	BMIClassification1	SSKF1	BF1	Triceps1	Subscap1	Waistcircumference1	WCCATEGO2011	WHtR1	BodyMass2	Stature2	BMI2	BMIClassification2	SSKF2	BF2	WHtR2	Triceps2	Subscap2	Waistcircumference2	WCCAT2012	Age3	Gender1Male0Female3	BodyMass3	Stature3	BMI3	BMICategories3	TricepsLmean3	SubscapL13	SubscapLmean3	Waistcircumferencemean3	WCCATE2013	WtHR3	filter_$	SSF3	SSKF2013	BF2013	Doyouparticipateinsport2011	Atwhatagedidexperiencedmenarche2011	Notyet2011	Atwhatagedidyourvoicebreak2011	Systolic2010	diastolic2010	Systolic2011	SystolicCAT2011
10001	15.1321	2	1	168.25	50.6	17.8748	2	18.45	13.7647	9.5	8.95	64.25	0	0.381872	51.6	166.95	18.513	2	12	11.588	0.387541	7.15	8.1	65.2	0	17	2	51.4	167.15	18.3971	1	6.8	6.4	6.5	62.6	0	0.374514	1	13.2	13.3	12.8894	#NULL!	#NULL!	#NULL!	#NULL!	#NULL!	#NULL!	102	0
10002	15.2717	1	1	164.95	49.75	18.2847	2	11.6	6.15952	5.8	5.8	65.55	0	0.397393	55.7	170.05	19.262	2	9.5	3.973	0.412232	5.8	6.2	70.3	0	17	1	60.25	173.65	19.9806	2	5.5	6.2	6.1	73.3	0	0.422113	#NULL!	11.7	11.6	6.15952	#NULL!	#NULL!	#NULL!	#NULL!	#NULL!	#NULL!	105	#NULL!
10003	15.25	2	1	156	40.9	16.8064	1	16.1	14.8989	8.8	7.3	60.8	0	0.389744	41.7	157.4	16.8316	1	10.45	9.97887	0.385006	8.15	6.25	60.75	0	17	2	46.7	157.8	18.7544	2	16.8	8	8.4	62.5	0	0.396071	1	24.8	25.2	22.7605	#NULL!	#NULL!	#NULL!	#NULL!	#NULL!	#NULL!	98	0
10004	15.8248	2	1	156.1	43.8	17.975	2	24.65	12.7909	14.25	10.4	62.65	0	0.4	#NULL!	#NULL!	#NULL!	#NULL!	#NULL!	#NULL!	#NULL!	#NULL!	#NULL!	#NULL!	#NULL!	#NULL!	2	#NULL!	#NULL!	#NULL!	#NULL!	#NULL!	#NULL!	#NULL!	#NULL!	#NULL!	#NULL!	#NULL!	#NULL!	#NULL!	#NULL!	#NULL!	#NULL!	#NULL!	#NULL!	#NULL!	#NULL!	#NULL!	#NULL!
10005	15.885	1	1	169.25	56.3	19.654	2	14.2	8.76888	6.9	7.3	64.35	0	0.380207	58	169.6	20.164	2	12	6.568	0.395637	6.8	7.8	67.15	0	17	1	57.4	170.55	19.7337	2	6.3	8.4	8.2	65.2	0	0.382293	1	14.7	14.5	14.0517	#NULL!	#NULL!	#NULL!	#NULL!	#NULL!	#NULL!	121	1
10006	15.9288	2	1	161.9	46.55	17.7593	2	20	14.9918	11.8	8.2	57.25	0	0.353613	52.6	155.95	21.6279	2	15.95	15.4063	0.404617	10.3	10.95	62.9	0	17	2	52.1	156.3	21.3265	2	9	12.12	11.36	63.1	0	0.403711	1	21.12	20.36	19.1899	#NULL!	#NULL!	#NULL!	#NULL!	#NULL!	#NULL!	109	0
10007	15.2936	1	1	165.1	50.6	18.5634	2	11.7	6.26188	6.1	5.6	64	0	0.387644	50.9	168.4	17.9487	2	9.1	3.54852	0.375297	5.85	5.9	62.8	0	17	1	52.25	169.75	18.1329	1	5.25	6.1	5.85	62.2	0	0.366421	1	11.35	11.1	10.6613	#NULL!	#NULL!	#NULL!	#NULL!	#NULL!	#NULL!	124	1
10008	15.4661	1	1	164.85	45.65	16.7982	1	10.9	5.43852	4.5	6.4	64.15	0	0.389142	50.25	165.35	18.3792	2	9.7	4.18428	0.407015	4.3	6.7	66.75	0	17	1	50.35	166.4	18.1841	1	3.8	7	7	66.6	0	0.40024	1	10.8	10.8	10.3477	#NULL!	#NULL!	#NULL!	#NULL!	#NULL!	#NULL!	104	0
10009	15.039	2	1	157.1	49.2	19.9348	2	22.8	22.4198	11.9	10.9	68.25	0	0.434437	51	156.6	20.7963	2	16.25	15.6797	0.548531	9.8	11.65	85.85	1	17	2	53.45	157.35	21.5881	2	12.8	10.8	10.7	70.8	0	0.449952	1	23.6	23.5	21.5758	#NULL!	#NULL!	#NULL!	#NULL!	#NULL!	#NULL!	98	0
10010	15.5483	1	1	165.3	56.1	20.5313	2	14.35	8.91612	6.15	8.2	66.6	0	0.402904	57.2	165.3	20.9339	2	11.9	6.46612	0.429522	5.5	8.7	71.1	0	17	1	57.85	165.95	21.0063	2	5.9	9.2	9	68.5	0	0.412775	1	15.1	14.9	14.4309	#NULL!	#NULL!	#NULL!	#NULL!	#NULL!	#NULL!	138	1
10012	15.2827	2	1	172.1	53.35	18.0124	2	18.9	15.725	10.8	8.1	62	0	0.360256	58.5	173.65	19.4002	2	11.15	10.7133	0.390441	10.5	7.75	67.95	0	17	2	58.5	174.45	19.2227	2	10.9	8	7.9	67.05	0	0.384351	1	18.9	18.8	17.9093	#NULL!	#NULL!	#NULL!	#NULL!	#NULL!	#NULL!	98	0
10014	14.987	2	1	147.2	40.25	18.5759	2	21.1	11.1787	10.05	11.05	59.65	0	0.405231	43.2	148.55	19.5767	2	14.3	13.8606	0.419387	8.8	9.3	62.35	0	16	2	46.85	148.45	21.2593	2	10.65	9.9	9.45	65.95	0	0.444257	1	20.55	20.1	18.9809	#NULL!	#NULL!	#NULL!	#NULL!	#NULL!	#NULL!	102	0
10018	15.781	2	1	162.6	81.55	30.8449	3	62	43.552	37.1	24.9	82.4	1	0.506765	84.4	159.9	33.01	3	41.8	30.3799	0.515322	25.3	23	82.7	1	17	2	85.85	163.05	32.2923	3	17.8	18.2	17.7	80.9	1	0.496167	1	36	35.5	29.083	#NULL!	#NULL!	#NULL!	#NULL!	#NULL!	#NULL!	106	0
10019	15.7974	2	1	155.6	82.45	34.0543	3	70.7	48.3022	33.6	37.1	86.9	1	0.558483	85.1	157.2	34.4369	3	58.25	30.8627	0.558524	25.3	44.45	87.65	1	17	2	82.35	157.05	33.3878	3	17.6	37	36.9	84.85	1	0.540274	1	54.6	54.5	39.457	#NULL!	#NULL!	#NULL!	#NULL!	#NULL!	#NULL!	123	1
10020	15.3046	2	1	147.4	47.4	21.8164	2	31.3	15.9957	16.9	14.4	65.1	0	0.441655	47.8	146.1	22.3938	2	25.3	22.8278	0.448323	17.4	15.7	64.8	0	17	2	49.3	146.8	22.8768	2	18.9	12.6	12.4	67.3	0	0.458447	1	31.5	31.3	26.393	#NULL!	#NULL!	#NULL!	#NULL!	#NULL!	#NULL!	110	0
10021	16.0274	1	1	171.65	54.6	18.5313	2	16.3	10.7975	7.9	8.4	64.9	0	0.378095	57.7	172.7	19.346	2	12.05	6.61888	0.389693	7.4	8.05	67.45	0	17	1	58.6	174.3	19.2887	2	6.9	9	8.6	67.65	0	0.388124	1	15.9	15.5	14.9918	#NULL!	#NULL!	#NULL!	#NULL!	#NULL!	#NULL!	108	0
10022	15.2197	2	1	157.3	47.15	19.0557	2	29	14.7125	14.8	14.2	63.95	0	0.406548	47.5	159.85	18.5895	2	19.5	18.4918	0.375352	10.9	13.3	60.1	0	17	2	47.75	161.15	18.3871	1	11.85	13.7	12.45	61.3	0	0.380391	1	25.55	24.3	22.1426	#NULL!	#NULL!	#NULL!	#NULL!	#NULL!	#NULL!	114	1
10023	15.2964	2	1	153.2	51.5	21.9427	2	37.1	29.9566	21.75	15.35	65.6	0	0.428198	52.6	154.5	22.0358	2	23.8	21.7903	0.431715	19.5	16.4	65.85	0	#NULL!	#NULL!	#NULL!	#NULL!	#NULL!	#NULL!	#NULL!	#NULL!	#NULL!	#NULL!	#NULL!	#NULL!	1	#NULL!	#NULL!	#NULL!	#NULL!	#NULL!	#NULL!	#NULL!	#NULL!	#NULL!	93	0
10024	15.8905	2	1	148.7	34.5	15.6026	1	14.95	23.0946	8.5	6.45	53.7	0	0.36113	35	149.2	15.7228	1	13	12.593	0.355228	9	5.8	52.65	0	17	2	36.1	150.05	16.0338	1	8.1	5.8	5.8	56.25	0	0.374875	1	13.9	13.9	13.4753	#NULL!	#NULL!	#NULL!	#NULL!	#NULL!	#NULL!	103	0
10026	14.6064	2	1	150.95	41.05	18.0155	2	23.65	13.1835	11.9	11.75	61.55	0	0.407751	45	152.7	19.299	2	24.4	22.2123	0.441388	12.6	15.1	67.25	0	#NULL!	#NULL!	#NULL!	#NULL!	#NULL!	#NULL!	#NULL!	#NULL!	#NULL!	#NULL!	#NULL!	#NULL!	1	#NULL!	#NULL!	#NULL!	#NULL!	#NULL!	#NULL!	#NULL!	#NULL!	#NULL!	103	0
10027	15.23	2	1	154.7	50.5	21.1014	2	21.9	9.66021	9.35	12.55	63.75	0	0.412088	50	162.25	18.9933	2	14.1	13.6685	0.359938	12.8	8.1	58	0	17	2	50.05	162.4	18.9772	2	11.45	9	9.4	57.5	0	0.354064	1	20.45	20.85	19.5791	#NULL!	#NULL!	#NULL!	#NULL!	#NULL!	#NULL!	100	0
10028	15.12	1	1	158.1	44.5	17.8031	2	14.6	9.16072	7	7.6	62.15	0	0.393106	43.7	159.4	17.1991	1	9.5	3.973	0.387077	6.5	6.9	61.7	0	17	1	44.8	159.7	17.5658	1	4.2	7	6.8	62.45	0	0.391046	1	11.2	11	10.557	#NULL!	#NULL!	#NULL!	#NULL!	#NULL!	#NULL!	122	1
10029	15.8056	1	1	166.3	51.5	18.6218	2	14	8.572	6.5	7.5	63.65	0	0.382742	#NULL!	#NULL!	#NULL!	#NULL!	#NULL!	#NULL!	#NULL!	#NULL!	#NULL!	#NULL!	#NULL!	#NULL!	#NULL!	#NULL!	#NULL!	#NULL!	#NULL!	#NULL!	#NULL!	#NULL!	#NULL!	#NULL!	#NULL!	1	#NULL!	#NULL!	#NULL!	#NULL!	#NULL!	#NULL!	#NULL!	#NULL!	#NULL!	112	0
10034	15.0992	2	1	149.3	49.1	22.0273	2	34.7	24.3662	18	16.7	67.6	0	0.45278	54.35	169.6	18.895	2	28.05	24.5781	0.408019	17.7	17.75	69.1	0	#NULL!	#NULL!	#NULL!	#NULL!	#NULL!	#NULL!	#NULL!	#NULL!	#NULL!	#NULL!	#NULL!	#NULL!	1	#NULL!	#NULL!	#NULL!	#NULL!	#NULL!	#NULL!	#NULL!	#NULL!	#NULL!	102	0
10036	14.4504	2	1	155.2	44.4	18.4331	2	21	17.6558	13	8	63.05	0	0.40625	46.15	155.35	19.1227	2	12.6	12.1941	0.407467	9.9	7.6	63.25	0	16	2	47.95	156.95	19.4655	2	9.1	8.2	8	65.5	0	0.41733	1	17.3	17.1	16.4417	#NULL!	#NULL!	#NULL!	#NULL!	#NULL!	#NULL!	102	0
10041	15.1485	2	1	173.25	76.2	25.3868	3	65.2	45.2992	28.5	36.7	84.35	1	0.486869	76.7	173.4	25.5092	3	44.7	30.9758	0.461361	22.6	25.9	79.75	1	#NULL!	#NULL!	#NULL!	#NULL!	#NULL!	#NULL!	#NULL!	#NULL!	#NULL!	#NULL!	#NULL!	#NULL!	1	#NULL!	#NULL!	#NULL!	#NULL!	#NULL!	#NULL!	#NULL!	#NULL!	#NULL!	110	0
10042	15.1458	2	1	162.25	76.5	29.0598	3	61.2	43.1152	26.6	34.6	85	0	0.523883	#NULL!	#NULL!	#NULL!	#NULL!	#NULL!	#NULL!	#NULL!	#NULL!	#NULL!	#NULL!	#NULL!	#NULL!	#NULL!	#NULL!	#NULL!	#NULL!	#NULL!	#NULL!	#NULL!	#NULL!	#NULL!	#NULL!	#NULL!	1	#NULL!	#NULL!	#NULL!	#NULL!	#NULL!	#NULL!	#NULL!	#NULL!	#NULL!	108	0
10043	15.6632	2	1	148.9	43.05	19.4171	2	27.35	10.1373	14.1	13.25	65.95	0	0.442915	43.4	148.45	19.6938	2	22.35	20.7317	0.444594	13.45	11.55	66.25	0	17	2	45.1	148.65	20.4102	2	8.3	11.6	11.3	66.6	0	0.448032	1	19.9	19.6	18.5739	#NULL!	#NULL!	#NULL!	#NULL!	#NULL!	#NULL!	112	0
10045	14.7817	2	1	156.15	45.7	18.7427	2	23.4	13.9085	14.7	8.7	63.55	0	0.40698	46.8	157	18.9866	2	15.85	15.3146	0.408917	14.2	9.05	64.15	0	16	2	49.6	158.7	19.6937	2	13.6	8.2	8.1	64.35	0	0.405482	1	21.8	21.7	20.2394	#NULL!	#NULL!	#NULL!	#NULL!	#NULL!	#NULL!	111	0
10046	15.0746	2	1	159.15	50.65	19.9971	2	37.5	30.175	17.5	20	64.85	0	0.407477	51	158.7	20.2496	2	26	23.292	0.406427	16	18.8	64.7	0	17	2	49.5	158.9	19.6046	2	13.4	13.2	12.2	61.6	0	0.387665	1	26.6	25.6	23.0283	#NULL!	#NULL!	#NULL!	#NULL!	#NULL!	#NULL!	107	0
10050	16.219	2	1	151.15	79.8	34.929	3	56.2	40.3852	28.6	27.6	83.85	1	0.554747	91.4	151.4	39.8744	3	47.3	31.3242	0.600396	28.4	19.8	91.15	1	17	2	94.5	151.35	41.2541	3	26	24	24	94.55	2	0.624711	1	50	50	37	#NULL!	#NULL!	#NULL!	#NULL!	#NULL!	#NULL!	94	0
10052	15.9233	2	1	157.3	47.9	19.3588	2	27.9	12.9877	16	11.9	67.6	0	0.429752	47.6	158.2	19.0193	2	15.8	15.2687	0.433628	13.7	8.2	69.1	0	17	2	48.7	159.3	19.191	2	15.5	8.4	8.9	66.3	0	0.416196	1	23.9	24.4	22.2123	#NULL!	#NULL!	#NULL!	#NULL!	#NULL!	#NULL!	106	0
10053	14.7899	1	1	151.2	41.1	17.9779	2	13.4	7.97752	6	7.4	63.8	0	0.421958	43.8	154.8	18.2781	2	10.9	5.43852	0.429587	5.6	7.7	66.15	0	16	1	47.8	156.5	19.5164	2	6.55	8.4	7.9	65.25	0	0.416933	1	14.95	14.45	14.0041	#NULL!	#NULL!	#NULL!	#NULL!	#NULL!	#NULL!	100	0
10056	16.0027	2	1	149.65	49.15	21.9467	2	26.75	14.1469	17.05	9.7	63.8	0	0.426328	48.1	151.15	21.0537	2	12.9	12.4937	0.418789	12.5	8.9	63.2	0	18	2	49.8	151.65	21.6543	2	15.4	9.2	9.25	64	0	0.422024	1	24.6	24.65	22.3854	#NULL!	#NULL!	#NULL!	#NULL!	#NULL!	#NULL!	96	0
10060	15.6085	1	1	164.5	50.2	18.5512	2	17.6	12.0179	11.3	6.3	66.95	0	0.406991	56	170.9	19.1736	2	9.7	4.18428	0.390872	7.4	5.7	66.45	0	17	1	60.4	176.05	19.4879	2	8.75	7	7.3	68.15	0	0.387106	1	15.75	16.05	15.4977	#NULL!	#NULL!	#NULL!	#NULL!	#NULL!	#NULL!	100	0
10062	15.1321	1	1	164.3	53.45	19.8003	2	15.2	9.74368	8.4	6.8	66.85	0	0.406878	57.3	168.4	20.2055	2	10.5	5.023	0.396675	8.9	6.9	66.65	0	17	1	60.25	169.95	20.86	2	8.2	7.8	7.8	69.25	0	0.407473	1	16	16	15.452	#NULL!	#NULL!	#NULL!	#NULL!	#NULL!	#NULL!	108	0
10063	15.6605	1	1	166.2	58	20.9974	2	18.2	12.5721	9.6	8.6	70	0	0.421179	62.85	169.3	21.9276	2	13.2	7.77808	0.428825	12.05	8	72.6	0	17	1	63.2	169.7	21.9459	2	10.6	7.6	7.55	72.05	0	0.424573	1	18.2	18.15	17.357	#NULL!	#NULL!	#NULL!	#NULL!	#NULL!	#NULL!	110	0
10065	14.4969	2	1	165.5	96.25	35.1402	3	60	42.46	29.9	30.1	101	2	0.610272	99.3	165.05	36.4517	3	50.5	31.5118	0.599818	23.7	30.3	98.9	2	16	2	93.35	164.25	34.6022	3	16.6	18.8	18.5	95.2	2	0.579604	1	35.4	35.1	28.8646	#NULL!	#NULL!	#NULL!	#NULL!	#NULL!	#NULL!	118	1
10067	14.9733	1	1	139.6	32.95	16.9077	1	13.2	7.77808	6.9	6.3	58.25	0	0.417264	36.5	146.65	16.9718	1	10.1	4.60492	0.40641	6.55	5.5	59.8	0	16	1	42.7	154.3	17.9348	1	4.8	5.6	5.5	64.2	0	0.416073	1	10.4	10.3	9.81983	#NULL!	#NULL!	#NULL!	#NULL!	#NULL!	#NULL!	110	0
10070	15.35	1	1	162.25	52.3	19.867	2	39.1	32.2153	22.05	17.05	66.45	0	0.409553	63.4	163.2	23.8039	2	41.5	34.0945	0.447304	20.9	24.2	73.15	0	17	0	67.9	165	24.9403	2	18.8	20	20.4	77.2	0	0.467879	1	38.8	39.2	31.1032	#NULL!	#NULL!	#NULL!	#NULL!	#NULL!	#NULL!	112	0
10071	15.36	1	1	162.1	38.45	14.6329	1	14.2	8.76888	9.1	5.1	58.6	0	0.361505	45.3	165.25	16.5888	1	13.2	7.77808	0.400605	11.6	7.4	65.15	0	16	1	56.4	172	19.0644	2	16.5	11.4	11.9	70.45	0	0.409593	1	27.9	28.4	24.7867	#NULL!	#NULL!	#NULL!	#NULL!	#NULL!	#NULL!	90	0
20001	15.165	1	1	170.65	51.8	17.7876	2	15.4	9.93672	8.6	6.8	63.3	0	0.370935	53.7	174.85	17.5648	2	10.8	5.33488	0.367744	6.7	7	64	0	17	0	57.3	177.5	18.1869	1	7.3	8.6	8.7	67	0	0.377465	1	15.9	16	15.452	2	#NULL!	#NULL!	12	140	71	128	1
20002	14.3874	1	1	168.45	55.55	19.5768	2	16.6	11.0815	7.5	9.1	66.25	0	0.393292	58.35	173	19.4961	2	14	8.572	0.379769	6.1	8.2	65.7	0	16	1	60	174.1	19.7949	2	7.4	8.6	8.8	66.35	0	0.381103	1	16	16.2	15.6343	2	#NULL!	#NULL!	12	132	74	138	1
20004	14.8474	1	1	151.55	51.45	22.4013	2	27.7	20.5787	16.5	11.2	65.3	0	0.430881	53.35	153.3	22.7013	2	16.9	11.3641	0.432485	11.9	10.1	66.35	0	16	1	53.8	154	22.6851	2	11.9	11.8	11.3	68.7	0	0.446104	1	23.7	23.2	21.3589	1	#NULL!	#NULL!	12	109	71	118	1
20005	15.3018	1	1	163	51.6	19.4211	2	18.5	12.847	11	7.5	60.95	0	0.373926	54.5	167.6	19.4021	2	13.1	7.67812	0.368735	8.2	7.5	61.95	0	17	1	54.2	170.5	18.6445	2	7	7.4	7.4	61.35	0	0.359824	1	14.4	14.4	13.9563	1	#NULL!	#NULL!	14	92	63	101	0
20006	14.6831	1	1	155.9	41.05	16.8897	1	13.6	8.17632	8.1	5.5	60.4	0	0.387428	43.75	159.8	17.1326	1	8.8	3.22848	0.395494	7.2	5.6	62.7	0	16	1	44.2	161.8	16.8836	1	5.7	5.2	5.1	64.3	0	0.397404	1	10.9	10.8	10.3477	1	#NULL!	#NULL!	13	108	64	110	0
20007	13.5852	1	1	160.05	49.55	19.3434	2	10.6	5.12712	4.7	5.9	65.4	0	0.408622	55.9	163.35	20.9495	2	11.15	5.69692	0.418733	6.2	6.95	68.45	0	15	1	60.3	165.15	22.1085	2	7.05	7.2	7.35	69.1	0	0.418408	1	14.25	14.4	13.9563	1	#NULL!	#NULL!	13	90	70	118	1
20009	15.0171	1	1	160.45	66.3	25.7534	3	29	21.562	15.5	13.5	79.35	1	0.494547	70.3	166.5	25.3587	3	20.55	14.6871	0.468468	13.25	13.15	78.05	1	17	1	66.75	168.5	23.5099	2	10.1	10	10	72.9	0	0.432641	1	20.1	20.1	18.9809	2	#NULL!	0	#NULL!	119	68	100	0
20010	15.1376	2	1	152.2	55	23.7429	2	31.95	14.3365	17.3	14.65	66.35	0	0.43594	62.2	152.95	26.5884	3	30.7	26.0786	0.465512	22.4	18.3	71.25	0	17	2	58.9	154.45	24.691	2	14.5	12	12.7	67.85	0	0.439301	1	26.5	27.2	24.0581	1	#NULL!	#NULL!	13	110	90	90	0
20011	14.9268	1	1	167.7	62.3	22.1525	2	24.7	18.2063	14	10.7	68.7	0	0.40966	65.4	171.3	22.2876	2	13.5	8.077	0.412142	11.7	9.3	70.4	0	16	1	58.95	174.25	19.415	2	5.6	6.2	6.2	65.35	0	0.375036	1	11.8	11.8	11.3839	1	#NULL!	0	#NULL!	130	70	111	0
20012	13.514	1	1	148.5	35.8	16.2342	1	15.5	10.033	9.3	6.2	59.5	0	0.400673	41.4	155.2	17.1877	1	10.5	5.023	0.398196	8.1	6.3	61.95	0	15	1	47.3	162.95	17.8136	1	7.4	6.8	6.8	64.6	0	0.396441	1	14.2	14.2	13.7647	1	#NULL!	#NULL!	13	91	61	120	1
20013	15.4716	1	1	159.9	40.6	15.8792	1	10.15	4.65732	4.65	5.5	59.5	0	0.372108	44.65	164.9	16.4203	1	8.2	2.58408	0.377198	5	5.8	62.35	0	17	1	47.2	165.5	17.2324	1	5.5	6.6	6.8	61.2	0	0.369789	1	12.1	12.3	11.8922	1	#NULL!	#NULL!	12	108	79	120	1
20014	14.4832	2	1	152.4	50.3	21.657	2	22.35	12.7909	12.15	10.2	64.55	0	0.423556	51.1	151.9	22.1465	2	15.2	9.74368	0.423963	11.2	11.6	64.65	0	16	2	54.3	153	23.1962	2	10.3	11	10.9	67.2	0	0.439216	1	21.3	21.2	19.8533	1	#NULL!	0	#NULL!	112	70	108	0
20015	14.9295	2	1	158.2	49.6	19.8184	2	21.3	12.4937	13	8.3	66.35	0	0.419406	50.2	158.7	19.932	2	12.9	12.4937	0.409578	11.1	7.7	65.5	0	16	2	52.7	161.25	20.268	2	13.3	9	9.5	67.2	0	0.416744	1	22.3	22.8	21.0661	1	12	#NULL!	#NULL!	108	78	90	0
20017	13.7112	2	1	149.6	41.5	18.5432	2	18.9	27.0902	11.2	7.7	58.4	0	0.390374	44.1	154	18.595	2	13.9	13.4753	0.386364	9	7.3	58.95	0	15	2	48.9	155.4	20.2492	2	12.1	8.4	8.4	61.75	0	0.397362	1	20.5	20.5	19.3018	1	13	#NULL!	#NULL!	87	60	92	0
20019	15.7728	2	1	169.7	51.5	17.8831	2	18.3	9.28548	10.1	8.2	62.35	0	0.367413	50.85	169.35	17.7305	2	13.6	13.1835	0.357248	7.3	6.8	60.85	0	#NULL!	#NULL!	#NULL!	#NULL!	#NULL!	#NULL!	#NULL!	#NULL!	#NULL!	#NULL!	#NULL!	#NULL!	1	#NULL!	#NULL!	#NULL!	1	#NULL!	#NULL!	12	120	71	102	0
20020	14.8364	2	1	148.4	46.05	20.9104	2	32.2	22.7605	18.6	13.6	63.2	0	0.425876	47.4	148.85	21.3934	2	24.8	22.4885	0.433322	17.7	13.2	64.35	0	16	2	45	149.2	20.2151	2	13.5	11	10.5	62.7	0	0.420241	1	24.5	24	21.932	1	14	#NULL!	#NULL!	120	79	118	1
20022	14.4641	1	1	159.6	50.5	19.8256	2	14.1	8.67052	7.7	6.4	67.35	0	0.421992	54.4	163.35	20.3873	2	10.7	5.23108	0.421182	7	6.5	68.5	0	16	1	55.25	164.8	20.3431	2	5.4	6.4	6.4	67.2	0	0.407767	1	11.8	11.8	11.3839	1	13	#NULL!	#NULL!	112	77	110	0
20023	14.924	1	1	168	56.1	19.8767	2	23.4	17.1335	12.5	10.9	71.5	0	0.425595	54	173.4	17.9596	2	11.75	6.313	0.393887	6.6	7.35	68.25	0	16	1	59.5	175.6	19.296	2	7.6	8.4	8.1	69.35	0	0.394932	1	16	15.7	15.1766	1	#NULL!	0	#NULL!	107	70	98	0
20024	15.332	2	1	148	51	23.2834	2	50.3	37.1638	26.4	23.9	67.75	0	0.45777	52.5	147.4	24.1638	2	37	28.913	0.466757	21.1	21.2	68.9	0	17	2	56.15	148.75	25.3767	3	21.4	21.6	21.5	71.2	0	0.478655	1	43	42.9	33.1234	1	#NULL!	0	#NULL!	80	60	94	0
20025	15.1129	2	1	155.6	65.9	27.2186	3	53.8	39.0748	23	30.8	80.9	1	0.519923	66.95	156.65	27.2829	3	51.2	31.5173	0.513884	24.8	34.2	80.45	1	17	2	69	156.35	28.2263	3	20.05	23	22.9	84.4	1	0.539815	1	43.05	42.95	33.1507	2	11	#NULL!	#NULL!	140	62	108	0
20026	14.7461	2	1	151.6	54.3	23.6266	2	40.1	31.5946	20.1	20	68.2	0	0.449868	#NULL!	#NULL!	#NULL!	#NULL!	#NULL!	#NULL!	#NULL!	#NULL!	#NULL!	#NULL!	#NULL!	#NULL!	#NULL!	#NULL!	#NULL!	#NULL!	#NULL!	#NULL!	#NULL!	#NULL!	#NULL!	#NULL!	#NULL!	1	#NULL!	#NULL!	#NULL!	2	11	#NULL!	#NULL!	118	70	106	0
20028	14.5927	1	1	152.5	48.3	20.7686	2	25.7	19.0131	14.4	11.3	68	0	0.445902	53.7	157.6	21.6203	2	15.1	9.64692	0.462563	14.4	9.1	72.7	0	16	1	60.15	166.55	21.6843	2	12.65	10.1	10.15	72.05	0	0.432603	1	22.75	22.8	21.0661	1	#NULL!	#NULL!	13	90	54	102	0
20029	14.5626	2	1	153.1	42.3	18.0464	2	18.4	16.6182	9.55	8.85	63.7	0	0.416068	44.2	152.95	18.894	2	13.7	13.281	0.40863	9.7	8.9	62.25	0	16	2	45.65	154.4	19.149	2	8.6	8.8	8.6	61.6	0	0.398964	1	17.4	17.2	16.5301	1	#NULL!	0	#NULL!	112	60	98	0
20030	14.1821	2	1	151.1	53.4	23.389	2	49.3	36.6178	26.6	22.7	65.5	0	0.433488	49.8	150.95	21.8556	2	29.2	25.2517	0.421332	19.7	16.6	63.6	0	16	2	53.55	152.2	23.1169	2	21.6	18	18.4	63.45	0	0.416886	1	39.6	40	31.54	1	#NULL!	0	#NULL!	91	67	102	0
20031	13.8426	2	1	164.25	47.6	17.644	2	27.7	14.0994	15	12.7	59.65	0	0.363166	47.4	165.55	17.295	1	15.9	15.3605	0.354576	12.2	7.9	59.3	0	15	2	51.15	167.7	18.1878	1	13	8.4	8.5	61.3	0	0.365534	1	21.4	21.5	20.0858	1	#NULL!	0	#NULL!	99	70	110	0
20032	14.1547	2	1	146.4	32.2	15.0236	1	16.4	18.5739	9.85	6.55	58.65	0	0.400615	32.9	148.1	14.9998	1	10	9.5	0.382174	10.5	6.2	56.85	0	16	2	34.2	148	15.6136	1	11	7.4	7.6	56	0	0.378378	1	18.4	18.6	17.7405	1	#NULL!	0	#NULL!	90	71	98	0
20033	15.6879	1	1	159.1	46.9	18.5282	2	14.8	9.35568	7.1	7.7	65.05	0	0.408862	#NULL!	#NULL!	#NULL!	#NULL!	#NULL!	#NULL!	#NULL!	#NULL!	#NULL!	#NULL!	#NULL!	#NULL!	#NULL!	#NULL!	#NULL!	#NULL!	#NULL!	#NULL!	#NULL!	#NULL!	#NULL!	#NULL!	#NULL!	1	#NULL!	#NULL!	#NULL!	1	#NULL!	0	#NULL!	94	61	110	0
20034	15.9452	1	1	166.6	53.8	19.3835	2	13.2	7.77808	6	7.2	65.55	0	0.393457	53.2	167.6	18.9393	2	10.95	5.49028	0.396181	6.4	7.35	66.05	0	17	1	57.2	168.05	20.2544	2	7.35	7.6	7.6	68.8	0	0.409402	1	14.95	14.95	14.478	1	#NULL!	0	#NULL!	96	60	90	0
20035	15.9069	2	1	156.5	69.6	28.4172	3	51.8	37.9828	22.1	29.7	84.85	1	0.542173	#NULL!	#NULL!	#NULL!	#NULL!	#NULL!	#NULL!	#NULL!	#NULL!	#NULL!	#NULL!	#NULL!	#NULL!	#NULL!	#NULL!	#NULL!	#NULL!	#NULL!	#NULL!	#NULL!	#NULL!	#NULL!	#NULL!	#NULL!	1	#NULL!	#NULL!	#NULL!	1	#NULL!	#NULL!	14	108	82	113	0
20037	15.7454	1	1	144.3	38.2	18.3455	2	12.9	7.47772	7.1	5.8	58.4	0	0.404712	64.3	166.15	23.2922	2	13.95	8.52268	0.442371	8.7	10.55	73.55	0	17	1	69.9	168	24.7662	2	12.35	12.6	12.8	78.6	1	0.467857	1	24.95	25.15	22.7267	1	#NULL!	#NULL!	13	120	68	98	0
20038	13.3607	2	1	150	37.7	16.7556	1	17.2	19.3018	9	8.2	59.9	0	0.399333	42.4	152.2	18.3036	2	15.2	14.7125	0.410644	10.3	8.2	62.4	0	15	2	47.75	154	20.1341	2	13.6	10.2	10.2	62.15	0	0.403571	1	23.8	23.8	21.7903	1	#NULL!	#NULL!	13	90	58	90	0
20039	14.976	2	1	155.4	66.9	27.7028	3	58.65	41.7229	30.25	28.4	77.5	1	0.498713	62.95	155.4	26.0672	3	30.1	25.7549	0.465251	19.1	17.9	71.95	1	17	2	67.6	155.3	28.0288	3	22.5	25.4	25.4	76.4	1	0.491951	1	47.9	47.9	35.8534	1	#NULL!	0	#NULL!	100	60	98	0
20040	14.7652	2	1	151.1	50.25	22.0093	2	28.35	15.1305	14.05	14.3	67.7	0	0.448048	53.6	151.4	23.3837	2	33.1	27.2801	0.455086	13.7	17.1	68.85	0	16	2	54.25	153.45	23.0391	2	15.1	17	17.1	71.95	0	0.468882	1	32.1	32.2	26.8471	1	12	#NULL!	#NULL!	83	70	100	0
20041	14.5298	2	1	159.4	58.6	23.0633	2	53.25	38.7745	24.6	28.65	68.25	0	0.428168	63.25	159.6	24.831	2	29.6	25.4779	0.458647	22.2	16.6	72.7	0	16	2	61.4	160.4	23.8649	2	23	18.8	18.6	70.6	0	0.44015	1	41.8	41.6	32.4136	1	12	#NULL!	#NULL!	98	70	110	0
20042	14.7762	2	1	159.6	73.9	29.0121	3	69.3	47.5378	31.05	38.25	78.75	1	0.493421	#NULL!	#NULL!	#NULL!	#NULL!	#NULL!	#NULL!	#NULL!	#NULL!	#NULL!	#NULL!	#NULL!	#NULL!	#NULL!	#NULL!	#NULL!	#NULL!	#NULL!	#NULL!	#NULL!	#NULL!	#NULL!	#NULL!	#NULL!	1	#NULL!	#NULL!	#NULL!	2	12	#NULL!	#NULL!	112	82	100	0
20043	14.9624	2	1	170.6	49	16.836	1	20.25	14.478	12.1	8.15	61.5	0	0.360492	#NULL!	#NULL!	#NULL!	#NULL!	#NULL!	#NULL!	#NULL!	#NULL!	#NULL!	#NULL!	#NULL!	#NULL!	#NULL!	#NULL!	#NULL!	#NULL!	#NULL!	#NULL!	#NULL!	#NULL!	#NULL!	#NULL!	#NULL!	1	#NULL!	#NULL!	#NULL!	2	11	#NULL!	#NULL!	100	60	102	0
20044	15.8795	2	1	154.1	57.2	24.0874	2	57.5	41.095	25.9	31.6	74.05	0	0.480532	54.7	154.1	23.0347	2	42.8	30.6101	0.438027	22	22.2	67.15	0	17	2	57.5	154.25	24.1667	2	17.5	19.8	19.9	69.6	0	0.451216	1	37.3	37.4	30.1204	1	14	#NULL!	#NULL!	114	64	112	0
20045	13.9548	1	1	152.6	49.4	21.2138	2	32.7	24.2127	16.2	16.5	68.7	0	0.450197	54.7	159	21.6368	2	18.65	12.9839	0.437107	12.15	10.25	69.35	0	15	1	59.85	167.85	21.2433	2	11	9.8	9.9	70.4	0	0.419422	1	20.8	20.9	19.6185	2	13	#NULL!	#NULL!	110	60	102	0
20046	14.6886	1	1	164.5	42.4	15.6687	1	9.8	4.28968	4.8	5	61.35	0	0.372948	48.55	167.7	17.2633	1	9.2	3.65488	0.384019	7.9	5.8	64.4	0	16	1	46.1	170.2	15.9141	1	4.7	5	4.6	58.75	0	0.345182	1	9.7	9.3	8.74463	1	#NULL!	0	#NULL!	90	50	106	0
20050	13.922	2	1	149.3	60.1	26.9622	3	50.7	37.3822	24.75	25.95	75.3	0	0.504354	63.8	152.6	27.3975	3	34.5	27.9118	0.459371	22.5	21.5	70.45	0	15	2	63.95	153.4	27.1763	3	20.5	19.8	20	70.5	0	0.459583	1	40.3	40.5	31.813	#NULL!	#NULL!	0	#NULL!	128	78	112	0
20051	14.8611	1	1	156.7	43.4	17.6747	2	25.2	18.6117	13.2	12	64.85	0	0.413848	47.85	161.9	18.2553	2	17.7	12.1107	0.411983	12.9	11.4	66.75	0	16	1	51.8	169.55	18.0191	1	9.8	8.4	8.5	66.2	0	0.390445	1	18.2	18.3	17.4854	1	#NULL!	0	#NULL!	100	70	88	0
20052	14.6338	1	1	166.1	51.6	18.703	2	13.1	7.67812	6	7.1	67.4	0	0.40578	54.9	169.25	19.1653	2	12.3	6.87268	0.412408	6.5	8.5	69.35	0	16	1	59.2	170.55	20.3525	2	6.15	10.6	10.4	71.65	0	0.420111	#NULL!	16.75	16.55	15.9508	1	#NULL!	0	#NULL!	100	60	90	#NULL!
20053	14.8008	1	1	161.4	59.2	22.7256	2	29	21.562	17.3	11.7	71	0	0.439901	62.5	166	22.6811	2	16.9	11.3641	0.433735	11.5	9.5	71.9	0	16	1	68	168.5	23.9502	2	14.1	12.6	12.9	75.45	0	0.447774	1	26.7	27	23.933	1	#NULL!	0	#NULL!	110	80	114	0
20055	14.8282	1	1	161	43.3	16.7046	1	12.2	6.77128	6.6	5.6	60.5	0	0.375776	44.7	163.5	16.7214	1	8.9	3.33532	0.364526	6.7	5.9	59.4	0	16	1	47.7	165.45	17.4255	1	5.8	6.4	6.3	61.2	0	0.3699	1	12.2	12.1	11.6897	#NULL!	#NULL!	#NULL!	#NULL!	#NULL!	#NULL!	102	0
20056	14.7242	1	#NULL!	166.6	59.8	21.5452	2	17.3	11.7387	8.7	8.6	71.25	0	0.427671	65.65	169.1	22.9587	2	13.8	8.37448	0.421644	7.9	9.2	71.4	0	16	1	66.3	168.8	23.2685	2	6.2	8.4	8.2	73.4	0	0.434834	1	14.6	14.4	13.9563	#NULL!	#NULL!	#NULL!	#NULL!	#NULL!	#NULL!	102	0
30001	15.6441	1	2	192.3	79.55	21.512	2	19.6	15.1427	9.9	9.7	78.45	0	0.407956	#NULL!	#NULL!	#NULL!	#NULL!	#NULL!	#NULL!	#NULL!	#NULL!	#NULL!	#NULL!	#NULL!	#NULL!	#NULL!	#NULL!	#NULL!	#NULL!	#NULL!	#NULL!	#NULL!	#NULL!	#NULL!	#NULL!	#NULL!	1	#NULL!	#NULL!	#NULL!	1	#NULL!	#NULL!	0	108	62	96	0
30002	15.1403	2	2	163	71.5	26.9111	3	36.4	29.5744	14.8	21.6	76.1	1	0.466871	72.8	164.5	26.9029	3	37.2	28.9861	0.469909	13	22.4	77.15	1	#NULL!	#NULL!	#NULL!	#NULL!	#NULL!	#NULL!	#NULL!	#NULL!	#NULL!	#NULL!	#NULL!	#NULL!	1	#NULL!	#NULL!	#NULL!	#NULL!	#NULL!	#NULL!	#NULL!	102	80	106	0
30004	15.4689	1	2	173.3	86.7	28.8684	3	44.85	36.7175	23.3	21.55	88.45	2	0.510387	99.3	179.8	30.7164	3	34	27.692	0.538376	18.8	23.2	97	2	17	1	103.25	182.55	30.9832	3	18.5	22	22.5	96.85	2	0.53054	1	40.5	41	34	1	#NULL!	#NULL!	13	94	56	106	0
30005	15.3155	1	2	177.9	76.8	24.2666	2	20.5	15.943	9.7	10.8	78.85	2	0.443227	88.3	179.7	27.3442	3	18.7	13.0295	0.466889	10.8	12.1	83.65	2	17	1	99.45	181.45	30.2058	3	13.6	17.2	17	92.55	2	0.510058	1	30.8	30.6	26.0253	1	#NULL!	#NULL!	13	100	68	100	0
30006	15.1376	2	1	152	63	27.268	3	41.8	32.5228	22.4	19.4	70.85	0	0.466118	67	151.5	29.191	3	35.3	28.2498	0.468647	22.3	20.7	71	0	17	2	75.4	150.5	33.2888	3	30.9	29.4	29.3	79.7	1	0.529568	1	60.3	60.2	42.5692	1	10	#NULL!	#NULL!	104	69	108	0
30007	13.7166	2	2	171.4	107.1	36.4559	3	68.1	46.8826	37.1	31	102.3	2	0.596849	118.5	173.1	39.548	3	51.6	31.5147	0.642403	26	31.6	111.1	2	#NULL!	#NULL!	#NULL!	#NULL!	#NULL!	#NULL!	#NULL!	#NULL!	#NULL!	#NULL!	#NULL!	#NULL!	1	#NULL!	#NULL!	#NULL!	1	13	#NULL!	#NULL!	105	62	90	0
30008	14.7242	2	1	167.5	89.6	31.9358	3	61.5	43.279	30	31.5	93.7	2	0.559403	84.1	166.2	30.4463	3	42.1	30.4517	0.528279	19.7	24.9	87.65	2	16	2	87.9	165.6	32.053	3	26.7	33.6	33.2	88.45	1	0.534118	1	60.3	59.9	42.4054	1	11	#NULL!	#NULL!	108	70	108	0
30010	15.0637	1	2	168.9	110.25	38.6473	3	57.3	46.4659	25.6	31.7	106.2	2	0.628774	120.8	170.2	41.7011	3	53.4	43.4122	0.658637	28.2	36.8	112.05	2	#NULL!	#NULL!	#NULL!	#NULL!	#NULL!	#NULL!	#NULL!	#NULL!	#NULL!	#NULL!	#NULL!	#NULL!	1	#NULL!	#NULL!	#NULL!	1	#NULL!	#NULL!	0	113	69	92	0
30011	15.2498	2	2	161.1	61.4	23.658	2	39.8	31.4308	23.1	16.7	72	0	0.446927	64.1	162.15	24.3795	2	33.6	27.5115	0.445883	25	19.2	72.9	0	#NULL!	#NULL!	#NULL!	#NULL!	#NULL!	#NULL!	#NULL!	#NULL!	#NULL!	#NULL!	#NULL!	#NULL!	1	#NULL!	#NULL!	#NULL!	2	12	#NULL!	#NULL!	98	62	98	0
30012	14.8747	2	2	164.7	49.6	18.285	2	20.8	10.6613	9.2	11.6	65.2	0	0.395871	#NULL!	#NULL!	#NULL!	#NULL!	#NULL!	#NULL!	#NULL!	#NULL!	#NULL!	#NULL!	#NULL!	#NULL!	#NULL!	#NULL!	#NULL!	#NULL!	#NULL!	#NULL!	#NULL!	#NULL!	#NULL!	#NULL!	#NULL!	1	#NULL!	#NULL!	#NULL!	1	0	#NULL!	#NULL!	103	70	80	0
30013	14.4586	2	2	171.9	51.6	17.4622	1	21.5	11.6897	13.3	8.2	62.1	0	0.361257	57.3	173.4	19.0571	2	19	18.077	0.376586	16.7	10.6	65.15	0	17	2	58.4	173.45	19.4117	2	17.4	10.2	10.1	63.3	0	0.364947	1	27.6	27.5	24.2438	1	12	#NULL!	#NULL!	92	55	94	0
30015	14.7899	1	2	177.9	62.9	19.8746	2	15.65	11.4771	8.1	7.55	66.25	0	0.3724	#NULL!	#NULL!	#NULL!	#NULL!	#NULL!	#NULL!	#NULL!	#NULL!	#NULL!	#NULL!	#NULL!	#NULL!	#NULL!	#NULL!	#NULL!	#NULL!	#NULL!	#NULL!	#NULL!	#NULL!	#NULL!	#NULL!	#NULL!	1	#NULL!	#NULL!	#NULL!	1	#NULL!	#NULL!	14	97	51	110	0
30017	15.1458	2	1	152.6	44.35	19.0452	2	36.2	29.4652	19.3	16.9	69.35	0	0.454456	44.7	151.5	19.4752	2	33.7	27.557	0.444884	15.8	18.7	68	0	17	2	40.2	152.3	17.3311	1	12.9	12.2	12	62.05	0	0.40742	#NULL!	25.1	24.9	22.5569	1	12	#NULL!	#NULL!	#NULL!	#NULL!	#NULL!	#NULL!
30018	14.4559	2	2	157.9	56.8	22.7816	2	51.6	37.8736	21.1	30.5	73.5	0	0.465484	#NULL!	#NULL!	#NULL!	#NULL!	#NULL!	#NULL!	#NULL!	#NULL!	#NULL!	#NULL!	#NULL!	16	2	50.75	157.05	20.576	2	13.6	16.2	16.2	63.75	0	0.405922	1	29.8	29.8	25.5895	#NULL!	#NULL!	#NULL!	#NULL!	94	60	101	0
30019	14.6338	1	2	166.5	63.7	22.9779	2	27.3	21.5707	14.7	12.6	80.3	1	0.482282	#NULL!	#NULL!	#NULL!	#NULL!	#NULL!	#NULL!	#NULL!	#NULL!	#NULL!	#NULL!	#NULL!	#NULL!	#NULL!	#NULL!	#NULL!	#NULL!	#NULL!	#NULL!	#NULL!	#NULL!	#NULL!	#NULL!	#NULL!	1	#NULL!	#NULL!	#NULL!	2	#NULL!	#NULL!	14	120	70	100	0
30020	15.6578	2	1	159	60.4	23.8915	2	37.6	30.2296	22.4	15.2	67.5	0	0.424528	67.7	159.3	26.6782	3	35.1	28.1669	0.441933	23.5	21.1	70.9	0	17	2	71.1	158.95	28.1416	3	22.15	20.4	19.9	73.6	0	0.463039	1	42.55	42.05	32.6593	1	0	#NULL!	#NULL!	101	70	100	0
30021	15.2936	2	2	172.2	67	22.5948	2	36.4	29.5744	21.9	14.5	68.25	0	0.396341	67.8	173.7	22.4714	2	27.3	24.1202	0.399539	19.7	14.5	69	0	17	2	65.55	178.05	20.6771	2	20.2	13.2	13.1	66.25	0	0.372086	1	33.4	33.3	27.3734	#NULL!	#NULL!	#NULL!	#NULL!	108	62	118	1
30022	15.1732	2	2	162.6	77.4	29.2752	3	57.6	41.1496	29.3	28.3	79.9	2	0.49139	79.4	161.05	30.6125	3	49.4	31.4773	0.497982	26.9	28.6	80.1	2	16	2	76.4	162.4	28.9682	3	22	25.8	26	78.5	1	0.483374	1	47.8	48	35.908	1	12	#NULL!	#NULL!	112	60	108	0
30023	15.0089	1	2	170.9	71.4	24.4464	2	40.25	33.1157	22.25	18	78.7	0	0.460503	#NULL!	#NULL!	#NULL!	#NULL!	#NULL!	#NULL!	#NULL!	#NULL!	#NULL!	#NULL!	#NULL!	#NULL!	#NULL!	#NULL!	#NULL!	#NULL!	#NULL!	#NULL!	#NULL!	#NULL!	#NULL!	#NULL!	#NULL!	1	#NULL!	#NULL!	#NULL!	#NULL!	#NULL!	#NULL!	#NULL!	92	68	95	0
30024	14.883	1	1	157.5	56.7	22.8571	2	29.4	23.1591	16.8	12.6	70.3	0	0.446349	58.1	155.95	23.8894	2	26.1	23.3573	0.436037	16	14.9	68.1	0	16	0	59.1	156	24.285	2	17.2	15	14.6	69.6	0	0.446154	1	32.2	31.8	26.6479	1	11	#NULL!	#NULL!	80	52	98	0
30026	15.2088	2	1	156.7	63.8	25.9826	3	36.7	31.5134	24.2	12.5	70.9	0	0.452457	#NULL!	#NULL!	#NULL!	#NULL!	#NULL!	#NULL!	#NULL!	#NULL!	#NULL!	#NULL!	#NULL!	#NULL!	#NULL!	#NULL!	#NULL!	#NULL!	#NULL!	#NULL!	#NULL!	#NULL!	#NULL!	#NULL!	#NULL!	1	#NULL!	#NULL!	#NULL!	1	12	#NULL!	#NULL!	118	64	106	0
30032	14.9897	2	1	154.9	44.8	18.6713	2	28.1	13.3783	18.3	9.8	61.7	0	0.398321	49	155.1	20.3691	2	18.2	17.3999	0.401676	17.4	8.6	62.55	0	16	2	47.95	154.45	20.1008	2	14.5	8.4	8.9	60.8	0	0.393655	1	22.9	23.4	21.5037	1	13	#NULL!	#NULL!	110	58	92	0
30035	15.1431	2	2	163.9	64	23.8244	2	31.6	12.8894	19.5	12.1	69.4	0	0.423429	60.9	165.9	22.1271	2	19.7	18.6558	0.405063	16.9	10.5	67.55	0	17	2	69.35	166	25.1669	3	19.45	15.8	15.6	71.9	0	0.433133	1	35.25	35.05	28.8373	1	13	#NULL!	#NULL!	118	58	100	0
30036	14.6612	2	2	165.3	95.75	35.0423	3	86.7	57.0382	40.7	46	100.25	2	0.606473	86.2	164.85	31.7197	3	39	29.597	0.543524	23.3	21.8	90.1	2	16	2	100.9	169.2	35.2444	3	24.7	30	29.5	96.5	2	0.570331	1	54.7	54.2	39.2932	2	11	#NULL!	#NULL!	122	58	100	0
30037	15.2608	2	1	165	60.2	22.112	2	42.2	32.7412	24.1	18.1	75.15	0	0.455455	60.9	166.5	21.9679	2	36.5	28.7258	0.446246	21.1	18.5	73.9	0	17	2	60	166.35	21.6823	2	22.4	17	17.4	75.4	0	0.453261	1	39.4	39.8	31.4308	1	12	#NULL!	#NULL!	100	72	92	0
30038	14.4339	1	2	159.6	47.5	18.6478	2	14.55	10.4119	7.65	6.9	65.7	0	0.411654	52.4	164.5	19.3642	2	9.9	5.69492	0.398176	5.9	6.9	65.4	0	15	1	55.7	167	19.972	2	6.35	7.8	7.45	69.3	0	0.41497	1	14.15	13.8	13.3783	#NULL!	#NULL!	#NULL!	#NULL!	86	58	84	0
30039	14.7625	1	2	170.2	65.1	22.473	2	28.6	22.5623	19.8	8.8	73.55	0	0.432139	70.5	180.5	21.6389	2	11.1	6.94532	0.407756	9.5	6.3	73.5	0	17	1	72.9	187.1	20.8248	2	7.5	6.2	6.3	72.8	0	0.389097	1	13.7	13.8	13.3783	1	#NULL!	#NULL!	0	122	74	96	0
30040	14.6256	2	1	157.9	49.3	19.7735	2	30	25.4217	17.7	12.3	63.7	0	0.40342	54.8	158.7	21.7584	2	19.65	18.6149	0.400126	17.95	11.55	63.4	0	16	2	57.7	159	22.8235	2	21.1	13.8	13.9	66.45	0	0.417925	1	34.9	35	28.81	1	13	#NULL!	#NULL!	104	60	100	0
30042	15.1184	1	2	166.8	49.7	17.8634	2	12.1	7.96972	6.8	5.3	64.95	0	0.389388	55.7	173.55	18.4929	2	9.3	5.06108	0.394123	5.4	6.1	67.45	0	17	1	62.2	177.15	19.8202	2	5.8	6	5.9	70.25	0	0.396557	1	11.8	11.7	11.2814	1	#NULL!	#NULL!	0	110	60	100	0
30043	15.3046	2	2	166.3	53.7	19.4173	2	24.5	28.125	15.9	8.6	65.9	0	0.396272	#NULL!	#NULL!	#NULL!	#NULL!	#NULL!	#NULL!	#NULL!	#NULL!	#NULL!	#NULL!	#NULL!	#NULL!	#NULL!	#NULL!	#NULL!	#NULL!	#NULL!	#NULL!	#NULL!	#NULL!	#NULL!	#NULL!	#NULL!	1	#NULL!	#NULL!	#NULL!	1	13	#NULL!	#NULL!	102	74	104	0
30045	15.321	2	2	170.1	71.4	24.6768	2	29.2	13.0858	19.3	9.9	71.95	0	0.422986	71.7	170.2	24.7514	2	24.5	22.2818	0.421857	21.3	9.9	71.4	0	17	2	75.35	171	25.7686	3	15.2	10.2	10.6	71.15	0	0.416082	1	25.4	25.8	23.1607	1	12	#NULL!	#NULL!	90	60	96	0
30046	15.3511	2	1	158.3	45.3	18.0774	2	24.6	10.0318	15.2	9.4	60.7	0	0.383449	48	159.25	18.927	2	18.5	17.6558	0.390581	17.3	10.1	62.1	0	17	2	49.2	160	19.2188	2	18.7	10	10.4	60.35	0	0.377188	1	28.7	29.1	25.1945	1	12	#NULL!	#NULL!	#NULL!	#NULL!	88	0
30046	13.7714	2	2	154.4	52.3	21.9385	2	22.7	16.1749	13.5	9.2	67.5	0	0.437176	62.5	156	25.6821	3	23.9	21.8613	0.463462	19.3	13.7	71.8	0	#NULL!	#NULL!	#NULL!	#NULL!	#NULL!	#NULL!	#NULL!	#NULL!	#NULL!	#NULL!	#NULL!	#NULL!	1	#NULL!	29.1	25.1945	1	13	#NULL!	#NULL!	91	60	96	0
30047	13.5305	2	2	156	46.65	19.1691	2	26.6	29.7518	15.5	11.1	60.8	0	0.389744	45.1	156.35	18.4493	2	17.7	16.9682	0.371602	15.2	10.1	58.3	0	#NULL!	#NULL!	#NULL!	#NULL!	#NULL!	#NULL!	#NULL!	#NULL!	#NULL!	#NULL!	#NULL!	#NULL!	1	#NULL!	#NULL!	#NULL!	1	10	#NULL!	#NULL!	#NULL!	#NULL!	98	0
30048	13.7495	2	1	155.3	40.3	16.7094	1	16.4	14.7125	9.4	7	55.9	0	0.359948	44.9	157.95	17.9973	2	12.3	11.8922	0.371637	11	7.3	58.35	0	15	2	49.15	160.15	19.1633	2	12	8.8	8.6	59.9	0	0.374024	1	20.8	20.6	19.3813	1	0	#NULL!	#NULL!	#NULL!	#NULL!	78	0
30049	13.2293	2	1	150.7	42.1	18.5377	2	22.2	16.1749	13.5	8.7	57.25	0	0.379894	45	150	20	2	20.7	19.4606	0.378667	17.5	11.1	56.95	0	#NULL!	#NULL!	#NULL!	#NULL!	#NULL!	#NULL!	#NULL!	#NULL!	#NULL!	#NULL!	#NULL!	#NULL!	1	#NULL!	#NULL!	#NULL!	1	#NULL!	#NULL!	11	#NULL!	#NULL!	108	0
30050	13.3799	2	1	153	43.3	18.4972	2	17.9	18.9	9.8	8.1	64.2	0	0.419608	#NULL!	#NULL!	#NULL!	#NULL!	#NULL!	#NULL!	#NULL!	#NULL!	#NULL!	#NULL!	#NULL!	#NULL!	#NULL!	#NULL!	#NULL!	#NULL!	#NULL!	#NULL!	#NULL!	#NULL!	#NULL!	#NULL!	#NULL!	1	#NULL!	#NULL!	#NULL!	1	11	#NULL!	#NULL!	#NULL!	#NULL!	98	0
30051	13.7029	1	2	159.5	55.8	21.9337	2	21.2	16.5565	14.1	7.1	69.9	0	0.438245	60.5	166.3	21.8761	2	10.5	6.323	0.428142	8	5.5	70.9	0	15	1	64.8	170.35	22.3301	2	9.4	5.2	5.7	73.6	0	0.432052	1	14.6	15.1	14.6189	1	#NULL!	#NULL!	0	#NULL!	#NULL!	114	0
30052	13.9877	1	2	173.5	56.4	18.7361	2	11.1	6.94532	6.1	5	67.8	0	0.390778	67.5	183.5	20.0462	2	10	5.8	0.4	6.2	5.6	73.8	0	15	1	75.55	189.35	21.0719	2	7.15	6.2	6.25	74.5	0	0.393451	1	13.35	13.4	12.9877	1	#NULL!	#NULL!	0	#NULL!	#NULL!	94	0
30053	14.3518	2	2	156	58.7	24.1206	2	40.7	31.9222	19.7	21	75.85	0	0.486218	#NULL!	#NULL!	#NULL!	#NULL!	#NULL!	#NULL!	#NULL!	#NULL!	#NULL!	#NULL!	#NULL!	#NULL!	#NULL!	#NULL!	#NULL!	#NULL!	#NULL!	#NULL!	#NULL!	#NULL!	#NULL!	#NULL!	#NULL!	1	#NULL!	#NULL!	#NULL!	1	10	#NULL!	#NULL!	#NULL!	#NULL!	110	0
30054	13.7495	2	2	161.9	54.4	20.7542	2	26.7	12.0938	14.6	12.1	67.05	0	0.414145	56.1	163.1	21.0889	2	17.1	16.4417	0.419375	14.4	12.5	68.6	0	15	2	57.05	163.7	21.2891	2	14.5	11.2	11.1	67.9	0	0.414783	1	25.7	25.6	23.0283	1	13	#NULL!	#NULL!	#NULL!	#NULL!	108	0
30055	14.0452	2	2	154	38	16.0229	1	14.5	16.1749	9.4	5.1	57.75	0	0.375	45.5	156.3	18.6249	2	13.5	13.0858	0.385797	14.6	6.7	60.15	0	#NULL!	#NULL!	#NULL!	#NULL!	#NULL!	#NULL!	#NULL!	#NULL!	#NULL!	#NULL!	#NULL!	#NULL!	1	#NULL!	#NULL!	#NULL!	1	13	#NULL!	#NULL!	#NULL!	#NULL!	90	0
30056	14.256	2	2	164	62.45	23.2191	2	28.2	19.6185	14.2	14	69.45	0	0.423476	61	163.75	22.7493	2	22.4	20.7691	0.40855	12.5	14.2	66.5	0	#NULL!	#NULL!	#NULL!	#NULL!	#NULL!	#NULL!	#NULL!	#NULL!	#NULL!	#NULL!	#NULL!	#NULL!	1	#NULL!	#NULL!	#NULL!	1	12	#NULL!	#NULL!	#NULL!	#NULL!	102	0
30057	14.2834	2	2	157.1	41.15	16.6731	1	16.2	14.8989	9	7.2	59.6	0	0.379376	48.1	159.3	18.9546	2	14.1	13.6685	0.381042	10.8	7.9	60.95	0	16	2	48.65	160.55	18.8739	2	11.7	9	9.1	60.6	0	0.377453	1	20.7	20.8	19.5397	1	0	#NULL!	#NULL!	#NULL!	#NULL!	92	0
30058	14.2149	2	2	159.6	20.95	8.22467	1	22.3	14.8058	13.7	8.6	66.4	0	0.41604	54.8	162	20.881	2	19.5	18.4918	0.407407	15.5	9.5	65.5	0	16	2	58.7	163.5	21.9585	2	18.5	13.2	13.2	70	0	0.428135	1	31.7	31.7	26.5974	1	12	#NULL!	#NULL!	#NULL!	#NULL!	81	0
30059	13.6427	2	2	153.7	53.6	22.6891	2	30.4	26.2984	20.4	10	67.25	0	0.437541	60.4	155.4	25.0112	3	25.4	22.8949	0.45045	19.9	11.8	70.05	0	#NULL!	#NULL!	#NULL!	#NULL!	#NULL!	#NULL!	#NULL!	#NULL!	#NULL!	#NULL!	#NULL!	#NULL!	1	#NULL!	#NULL!	#NULL!	1	12	#NULL!	#NULL!	#NULL!	#NULL!	110	0
30060	13.9302	2	2	171.7	69.4	23.5407	2	41.6	32.4136	22.3	19.3	78.45	1	0.456902	62.7	172.85	20.986	2	19.3	18.3266	0.429274	12.7	11.7	74.5	1	#NULL!	#NULL!	#NULL!	#NULL!	#NULL!	#NULL!	#NULL!	#NULL!	#NULL!	#NULL!	#NULL!	#NULL!	1	#NULL!	#NULL!	#NULL!	1	12	#NULL!	#NULL!	#NULL!	#NULL!	90	0
30062	13.8864	1	2	159	54.75	21.6566	2	21	16.382	14	7	71.75	0	0.451258	#NULL!	#NULL!	#NULL!	#NULL!	#NULL!	#NULL!	#NULL!	#NULL!	#NULL!	#NULL!	#NULL!	#NULL!	#NULL!	#NULL!	#NULL!	#NULL!	#NULL!	#NULL!	#NULL!	#NULL!	#NULL!	#NULL!	#NULL!	1	#NULL!	#NULL!	#NULL!	1	#NULL!	#NULL!	14	#NULL!	#NULL!	100	0
30063	14.3244	1	2	163.1	50.1	18.8334	2	14.1	9.97052	8.3	5.8	68.3	0	0.418761	60.2	173	20.1143	2	8.45	4.15328	0.399422	6.45	5.35	69.05	0	16	1	69.4	178.45	21.7935	2	8	6	6.2	74.4	0	0.416924	1	14	14.2	13.7647	1	#NULL!	#NULL!	0	#NULL!	#NULL!	108	0
30064	14.527	1	3	169.9	50.65	17.5466	1	14.95	10.8015	8.7	6.25	68.35	0	0.402295	54.2	170.05	18.7433	2	9	4.742	0.406351	6	6.1	69.55	0	16	1	57.2	172.05	19.3235	2	7.9	7.2	7.2	71.15	0	0.413543	1	15.1	15.1	14.6189	1	#NULL!	#NULL!	13	#NULL!	#NULL!	112	0
30065	14.0096	1	2	168.4	69.8	24.6134	2	31.9	24.9581	16.6	15.3	72.75	0	0.432007	70.95	170.5	24.4064	2	20.6	16.0311	0.438123	14.1	13.6	74.8	0	15	1	80.35	171.2	27.4144	3	22	20	20.1	81.1	1	0.473715	1	42	42.1	34.5643	1	#NULL!	#NULL!	12	#NULL!	#NULL!	126	1
30066	13.9795	1	2	166.5	65.7	23.6994	2	19.5	15.053	10.6	8.9	70.7	0	0.424625	67.4	170.3	23.2397	2	9.35	5.11412	0.415737	7.35	6.55	70.7	0	#NULL!	#NULL!	#NULL!	#NULL!	#NULL!	#NULL!	#NULL!	#NULL!	#NULL!	#NULL!	#NULL!	#NULL!	1	#NULL!	#NULL!	#NULL!	1	#NULL!	#NULL!	12	#NULL!	#NULL!	104	0
30067	13.6975	1	2	172.7	60.9	20.4189	2	15.45	11.2849	8.3	7.15	68.6	0	0.397221	66.9	177.7	21.1861	2	10.15	5.95732	0.395611	6.3	6.15	70.1	0	15	1	72.1	183	21.5295	2	6.05	6.8	7.1	71.95	0	0.393169	1	12.85	13.15	12.7415	1	#NULL!	#NULL!	11	#NULL!	#NULL!	120	1
30080	16.1123	1	2	173.4	61.1	20.3209	2	15.2	11.0437	7.9	7.3	70.15	0	0.404556	#NULL!	#NULL!	#NULL!	#NULL!	#NULL!	#NULL!	#NULL!	#NULL!	#NULL!	#NULL!	#NULL!	#NULL!	#NULL!	#NULL!	#NULL!	#NULL!	#NULL!	#NULL!	#NULL!	#NULL!	#NULL!	#NULL!	#NULL!	1	#NULL!	#NULL!	#NULL!	1	#NULL!	#NULL!	13	#NULL!	#NULL!	84	0
40002	14.6475	2	2	162.2	63.2	24.0223	2	27.7	12.6921	18.4	9.3	68.9	0	0.424784	66.5	161.35	25.5437	3	26	23.292	0.43322	20.65	12.9	69.45	0	#NULL!	#NULL!	#NULL!	#NULL!	#NULL!	#NULL!	#NULL!	#NULL!	#NULL!	#NULL!	#NULL!	#NULL!	1	#NULL!	#NULL!	#NULL!	1	11	#NULL!	#NULL!	98	62	88	0
40003	14.935	1	2	167.3	54.7	19.5432	2	14.2	10.0689	7.2	7	66.55	0	0.397788	85.5	196.2	22.211	2	11	6.842	0.350663	6.4	7.2	68.4	0	#NULL!	#NULL!	#NULL!	#NULL!	#NULL!	#NULL!	#NULL!	#NULL!	#NULL!	#NULL!	#NULL!	#NULL!	1	#NULL!	#NULL!	#NULL!	1	#NULL!	#NULL!	13	102	64	120	0
40004	14.9103	1	2	186.1	86.65	25.0193	3	26	20.552	15	11	85.55	2	0.459699	93.3	187.7	26.4821	3	18.9	14.5113	0.457112	13.7	12.1	86.1	2	16	1	100.5	188.35	28.3292	3	14.65	17.2	17.2	89.35	1	0.474383	1	31.85	31.85	26.673	1	#NULL!	#NULL!	12	100	62	108	0
40006	15.7673	1	2	174	78.9	26.0602	3	32.8	25.5813	19.1	13.7	80.1	2	0.460345	87.7	173.85	29.0168	3	25.5	20.153	0.50906	21.8	18.5	88.3	2	18	1	90.85	174.85	29.7162	3	20.1	18.8	18.6	89.5	1	0.511867	#NULL!	38.9	38.7	31.9021	1	#NULL!	#NULL!	12	108	58	92	#NULL!
40007	15.1294	1	2	166.6	49.75	17.9243	2	26.7	21.1039	17.8	8.9	67.25	0	0.403661	56.7	172.75	18.9997	2	17.7	13.4107	0.403473	15.5	8.5	69.6	0	17	1	61.75	182.05	18.6318	2	7.9	7	7.1	68.25	0	0.374897	1	14.9	15	14.525	1	#NULL!	#NULL!	12	94	62	94	0
40008	15.2553	1	2	175.3	60.3	19.6225	2	20.6	16.0311	12.2	8.4	68.8	0	0.39247	68.45	179.4	21.2681	2	16.1	11.9073	0.412486	17.8	10.1	74.3	0	16	1	75.8	180.3	23.3173	2	14.9	14.6	14.9	80.1	1	0.44426	1	29.5	29.8	25.5895	#NULL!	#NULL!	#NULL!	#NULL!	100	60	112	0
40008	15.1431	2	2	161.2	53.2	20.473	2	34.2	12.2942	19.7	14.5	65.6	0	0.406948	#NULL!	#NULL!	#NULL!	#NULL!	#NULL!	#NULL!	#NULL!	#NULL!	#NULL!	#NULL!	0	#NULL!	#NULL!	#NULL!	#NULL!	#NULL!	#NULL!	#NULL!	#NULL!	#NULL!	#NULL!	#NULL!	#NULL!	#NULL!	#NULL!	29.8	25.5895	#NULL!	#NULL!	#NULL!	#NULL!	#NULL!	#NULL!	#NULL!	#NULL!
40009	14.5243	1	2	179.2	63.65	19.8209	2	15.4	11.2367	7.5	7.9	70.9	0	0.395647	72.1	181.5	21.8868	2	12.9	8.77772	0.408815	7.7	8.5	74.3	0	16	1	75.4	182.1	22.738	2	9.9	9.9	9.85	76.25	1	0.418726	1	19.8	19.75	18.6967	1	#NULL!	#NULL!	13	90	50	102	0
40010	14.8693	1	2	177.5	92.3	29.2958	3	44.7	36.6001	23	21.7	91.95	2	0.518028	102.7	178.4	32.2686	3	43.3	31.8939	0.556614	20.1	27.1	99.15	2	16	1	105.45	178.35	33.1513	3	21.2	31.4	31.5	103.6	2	0.58088	#NULL!	52.6	52.7	42.8641	1	#NULL!	#NULL!	12	116	70	110	#NULL!
40011	15.2717	1	2	182.4	66.9	20.1084	2	13.7	9.57548	6.4	7.3	73.15	0	0.401042	72.9	182.4	21.9118	2	11.2	7.04848	0.416667	7.4	7.8	76.05	0	17	1	73.8	184.05	21.7864	2	6.4	7.6	7.4	76.65	1	0.416463	1	14	13.8	13.3783	1	#NULL!	#NULL!	13	120	80	138	1
40012	14.8857	1	2	179.8	62.55	19.3485	2	12.5	8.375	5.7	6.8	70.3	0	0.39099	64.6	181	19.7186	2	9.6	5.37872	0.393923	5.5	7.4	71.4	0	16	1	67.3	180.95	20.5541	2	6.8	7.4	7.1	73.65	0	0.407019	1	14.2	13.9	13.4753	1	#NULL!	#NULL!	12	114	70	118	1
40013	16.23	1	2	167.55	49.8	17.7395	2	16.8	12.5701	9.3	7.5	67.35	0	0.40197	#NULL!	#NULL!	#NULL!	#NULL!	#NULL!	#NULL!	#NULL!	#NULL!	#NULL!	#NULL!	#NULL!	#NULL!	#NULL!	#NULL!	#NULL!	#NULL!	#NULL!	#NULL!	#NULL!	#NULL!	#NULL!	#NULL!	#NULL!	1	#NULL!	#NULL!	#NULL!	2	#NULL!	#NULL!	14	100	66	110	0
40014	14.7105	2	2	157.3	40.3	16.2872	1	18.55	20.468	10.6	7.95	58.3	0	0.370629	#NULL!	#NULL!	#NULL!	#NULL!	#NULL!	#NULL!	#NULL!	#NULL!	#NULL!	#NULL!	#NULL!	#NULL!	#NULL!	#NULL!	#NULL!	#NULL!	#NULL!	#NULL!	#NULL!	#NULL!	#NULL!	#NULL!	#NULL!	1	#NULL!	#NULL!	#NULL!	1	13	#NULL!	#NULL!	108	72	98	0
40016	14.8474	2	1	160.1	52	20.2871	2	31	16.9682	17.6	13.4	65.85	0	0.411305	#NULL!	#NULL!	#NULL!	#NULL!	#NULL!	#NULL!	#NULL!	#NULL!	#NULL!	#NULL!	#NULL!	#NULL!	#NULL!	#NULL!	#NULL!	#NULL!	#NULL!	#NULL!	#NULL!	#NULL!	#NULL!	#NULL!	#NULL!	1	#NULL!	#NULL!	#NULL!	1	14	#NULL!	#NULL!	90	60	88	0
40020	14.5079	2	2	161.4	60.8	23.3398	2	47.75	35.7715	27.1	20.65	69.5	0	0.430607	61.6	162.3	23.3853	2	31.5	26.4958	0.425139	25.9	18.9	69.05	0	#NULL!	#NULL!	#NULL!	#NULL!	#NULL!	#NULL!	#NULL!	#NULL!	#NULL!	#NULL!	#NULL!	#NULL!	1	#NULL!	#NULL!	#NULL!	1	12	#NULL!	#NULL!	90	52	102	0
40021	15.1513	2	2	165.4	50.5	18.4595	2	21.05	15.9058	12.45	8.6	64.35	0	0.389057	51.3	165.75	18.6728	2	14.1	13.6685	0.389744	12.4	7.9	64.25	0	17	2	52.2	166.7	18.7845	2	11.7	9.6	9.1	64.75	0	0.388422	1	21.3	20.8	19.5397	1	13	#NULL!	#NULL!	92	52	98	0
40022	15.0965	1	3	163.5	57.2	21.3974	2	20.9	16.2945	12	8.9	70.6	0	0.431804	66.5	180.65	20.3773	2	10.8	6.63488	0.401329	6.2	7.4	73	0	#NULL!	#NULL!	#NULL!	#NULL!	#NULL!	#NULL!	#NULL!	#NULL!	#NULL!	#NULL!	#NULL!	#NULL!	1	#NULL!	#NULL!	#NULL!	2	#NULL!	#NULL!	13	90	60	110	0
40023	14.987	2	2	160	68.05	26.582	3	42.5	32.905	27	15.5	74.75	0	0.467187	66.7	161.1	25.7001	3	23.55	21.6117	0.446927	16.05	11.35	72.15	0	16	2	67.8	161.5	25.9947	3	15.2	11.4	11.4	73.4	0	0.454489	1	26.6	26.6	23.6797	1	11	#NULL!	#NULL!	88	62	94	0
40024	14.653	2	2	164.5	54.9	20.2881	2	33.7	10.4525	14.7	19	65.9	0	0.400608	#NULL!	#NULL!	#NULL!	#NULL!	#NULL!	#NULL!	#NULL!	#NULL!	#NULL!	#NULL!	#NULL!	#NULL!	#NULL!	#NULL!	#NULL!	#NULL!	#NULL!	#NULL!	#NULL!	#NULL!	#NULL!	#NULL!	#NULL!	1	#NULL!	#NULL!	#NULL!	1	12	#NULL!	#NULL!	108	60	94	0
40027	14.6229	2	2	171	58.75	20.0917	2	23.7	14.0517	13.6	10.1	68.65	0	0.401462	#NULL!	#NULL!	#NULL!	#NULL!	#NULL!	#NULL!	#NULL!	#NULL!	#NULL!	#NULL!	#NULL!	#NULL!	#NULL!	#NULL!	#NULL!	#NULL!	#NULL!	#NULL!	#NULL!	#NULL!	#NULL!	#NULL!	#NULL!	1	#NULL!	#NULL!	#NULL!	1	13	#NULL!	#NULL!	100	62	100	0
40028	14.9459	2	2	161.2	56.9	21.8969	2	36.2	29.4652	17.6	18.6	74.4	0	0.461538	61.2	161.15	23.5663	2	29.4	25.3653	0.475334	19.4	20.5	76.65	0	16	2	66.9	163.1	25.1489	3	16.2	20.6	21.1	80.75	1	0.495095	1	36.8	37.3	30.0658	2	0	#NULL!	#NULL!	90	50	94	0
40029	15.269	2	2	159.2	49.9	19.6886	2	25.75	9.28548	15.2	10.55	65	0	0.408291	52.2	158.9	20.6739	2	19.3	18.3266	0.412209	17.2	10.9	65.8	0	17	2	54.3	160.05	21.1977	2	15.8	11.8	11.6	66.35	0	0.414558	1	27.6	27.4	24.1821	1	13	#NULL!	#NULL!	104	70	90	0
40033	15.332	2	2	171.5	58.1	19.7537	2	25.5	17.7405	13.4	12.1	73.75	0	0.430029	61.4	172.7	20.5866	2	19.6	18.5739	0.4337	13.8	12.6	75.25	1	17	2	63.1	173.1	21.0589	2	14.3	14.2	14	77.7	1	0.448873	1	28.5	28.3	24.7274	2	13	#NULL!	#NULL!	102	54	92	0
40037	15.4962	2	2	163.65	56.75	21.1901	2	31.3	18.8189	19	12.3	70.35	0	0.429881	#NULL!	#NULL!	#NULL!	#NULL!	#NULL!	#NULL!	#NULL!	#NULL!	#NULL!	#NULL!	#NULL!	#NULL!	#NULL!	#NULL!	#NULL!	#NULL!	#NULL!	#NULL!	#NULL!	#NULL!	#NULL!	#NULL!	#NULL!	1	#NULL!	#NULL!	#NULL!	2	0	#NULL!	#NULL!	90	56	92	0
40039	15.3457	2	2	169.7	68.1	23.6474	2	32.3	9.60687	16.4	15.9	71.95	0	0.423984	72.6	171.2	24.7702	2	32.1	26.7977	0.431075	17.05	18.3	73.65	0	17	2	76.6	172.35	25.7873	3	15.8	19.8	19.9	78.1	1	0.453148	1	35.6	35.7	29.1922	1	#NULL!	#NULL!	#NULL!	106	68	96	0
40040	14.5188	2	2	171.5	71.6	24.3436	2	38	30.448	22.7	15.3	75.1	0	0.437901	#NULL!	#NULL!	#NULL!	#NULL!	#NULL!	#NULL!	#NULL!	#NULL!	#NULL!	#NULL!	#NULL!	#NULL!	#NULL!	#NULL!	#NULL!	#NULL!	#NULL!	#NULL!	#NULL!	#NULL!	#NULL!	#NULL!	#NULL!	1	#NULL!	#NULL!	#NULL!	1	13	#NULL!	#NULL!	92	58	96	0
40041	14.3655	2	2	163.6	59.65	22.2866	2	27.1	17.825	15	12.1	72.1	0	0.440709	59.7	163.4	22.3599	2	18.1	17.3141	0.429009	15.7	10.5	70.2	0	#NULL!	#NULL!	#NULL!	#NULL!	#NULL!	#NULL!	#NULL!	#NULL!	#NULL!	#NULL!	#NULL!	#NULL!	1	#NULL!	#NULL!	#NULL!	1	13	#NULL!	#NULL!	84	51	90	0
40043	14.4038	2	2	168.4	62.8	22.145	2	26.8	8.52647	16	10.8	71.7	0	0.425772	67.3	172.45	22.6302	2	23.1	21.2861	0.443607	15.6	14.3	76.4	0	16	2	73.3	171.35	24.9652	2	20.1	18.2	18.3	79.9	1	0.466297	1	38.3	38.4	30.6664	1	11	#NULL!	#NULL!	90	58	100	0
40044	15.0281	2	2	165.3	51.7	18.921	2	17.85	15.2687	10.05	7.8	64	0	0.387175	#NULL!	#NULL!	#NULL!	#NULL!	12.75	12.3442	#NULL!	9.5	8.15	64.3	0	#NULL!	#NULL!	#NULL!	#NULL!	#NULL!	#NULL!	#NULL!	#NULL!	#NULL!	#NULL!	#NULL!	#NULL!	1	#NULL!	#NULL!	#NULL!	1	14	#NULL!	#NULL!	110	50	88	0
40045	15.1951	1	2	176.1	57.1	18.4127	2	15.3	11.1403	7.1	8.2	69.4	0	0.394094	62.2	179.1	19.391	2	12	7.868	0.394752	6.45	7.8	70.9	0	17	1	69	179.85	21.3318	2	6.6	9.2	8.95	75.9	1	0.422018	1	15.8	15.55	15.0381	1	#NULL!	#NULL!	14	94	70	92	0
40046	14.9268	2	2	176.5	85.3	27.3816	3	39.75	31.4035	16.8	22.95	87.5	2	0.495751	91.3	177.85	28.8644	3	31	24.322	0.500422	13.4	23.4	88.8	2	16	1	91.8	180.1	28.3019	3	9.9	20	19.9	87.15	1	0.483898	1	29.9	29.8	25.5895	1	#NULL!	#NULL!	12	112	74	108	0
40049	12.0027	1	2	190.7	85	23.3732	2	29.5	23.233	20.1	9.4	76.45	0	0.400891	#NULL!	#NULL!	#NULL!	#NULL!	#NULL!	#NULL!	#NULL!	#NULL!	#NULL!	#NULL!	#NULL!	#NULL!	#NULL!	#NULL!	#NULL!	#NULL!	#NULL!	#NULL!	#NULL!	#NULL!	#NULL!	#NULL!	#NULL!	1	#NULL!	#NULL!	#NULL!	1	#NULL!	#NULL!	0	98	78	92	0
40050	14.527	1	2	167.1	77	27.5764	3	35	27.05	17.9	17.1	85.65	1	0.512567	#NULL!	#NULL!	#NULL!	#NULL!	#NULL!	#NULL!	#NULL!	#NULL!	#NULL!	#NULL!	#NULL!	#NULL!	#NULL!	#NULL!	#NULL!	#NULL!	#NULL!	#NULL!	#NULL!	#NULL!	#NULL!	#NULL!	#NULL!	1	#NULL!	#NULL!	#NULL!	1	#NULL!	#NULL!	14	112	70	112	0
40051	14.4339	1	2	165.4	71.7	26.2089	3	39.5	32.5285	22.4	17.1	82.45	1	0.498489	82.8	171.7	28.086	3	28.7	22.6375	0.500874	20.1	16.5	85.8	1	17	1	85.95	177.2	27.3728	3	15.2	11.2	11	81.1	1	0.457675	1	26.4	26.2	23.4223	1	#NULL!	#NULL!	13	102	68	102	0
40052	15.1513	1	2	181.7	66.95	20.2787	2	16.8	12.5701	8	8.8	70.6	0	0.388553	79.1	182.9	23.6455	2	17.05	12.8049	0.437944	11.35	11.65	80.35	1	16	1	85.8	183.7	25.4255	3	12.2	17.6	17.7	84.55	1	0.460261	1	29.8	29.9	25.6449	1	#NULL!	#NULL!	13	100	55	102	0
40055	14.9788	1	2	178.7	59.1	18.5071	2	20	15.5	11.8	8.2	67.8	0	0.379407	64.6	181.3	19.6534	2	13.1	8.97812	0.37893	8.9	8.2	69.1	0	16	1	63.6	181.2	19.3705	2	10.3	9	9.05	69.55	0	0.38383	#NULL!	19.3	19.35	18.368	1	#NULL!	#NULL!	13	108	48	#NULL!	#NULL!
40057	15.321	1	2	175.1	58	18.9171	2	16.4	12.1923	8.9	7.5	65.9	0	0.376356	61	176.95	19.4818	2	10.55	6.37508	0.396157	6.9	7.15	69.6	0	17	1	#NULL!	#NULL!	#NULL!	#NULL!	#NULL!	#NULL!	#NULL!	#NULL!	#NULL!	#NULL!	1	#NULL!	#NULL!	#NULL!	1	#NULL!	#NULL!	13	94	72	100	0
40059	15.2964	1	2	189.4	78.6	21.911	2	14.3	10.1671	6.4	7.9	75.85	1	0.400475	82.4	189.7	22.8977	2	11.5	7.357	0.394307	5.9	7.7	75.2	1	#NULL!	#NULL!	#NULL!	#NULL!	#NULL!	#NULL!	#NULL!	#NULL!	#NULL!	#NULL!	#NULL!	#NULL!	1	#NULL!	#NULL!	#NULL!	1	#NULL!	#NULL!	13	#NULL!	#NULL!	96	0
40060	15.1513	1	3	165.8	52.4	19.0617	2	13.8	8.37448	6.7	7.1	67.25	0	0.405609	56.6	167	20.2947	2	8.95	3.38868	0.401198	4.5	6.15	67.1	0	17	1	58.1	167.6	20.6837	2	5.9	7.5	7.15	68.2	0	0.406921	1	13.4	13.05	12.6426	1	#NULL!	#NULL!	11	#NULL!	#NULL!	108	0
50001	13.4319	2	1	149	55.9	25.179	3	43.8	33.6148	24.7	19.1	70.6	0	0.473826	61.4	151.2	26.8575	3	34.9	28.0829	0.478175	30	20.7	72.1	0	15	2	62	150.7	27.3002	3	27.3	21.8	21.7	71.5	0	0.474453	#NULL!	49.1	49	36.454	1	11	#NULL!	#NULL!	122	62	#NULL!	#NULL!
50002	15.7043	2	1	152.35	54.25	23.373	2	32.6	29.988	21.2	11.4	72.95	0	0.478832	55	150.65	24.234	2	21.4	20.0085	0.462662	20.2	11.2	70.15	0	17	2	58.8	151.55	25.6015	3	21.6	15.6	15.5	74.3	0	0.490267	#NULL!	37.2	37.1	29.9566	1	0	#NULL!	#NULL!	103	90	#NULL!	#NULL!
50005	14.4312	1	1	150.9	41.6	18.269	2	17.7	12.1107	10.6	7.1	58.05	0	0.384692	45.7	157.5	18.4228	2	9.3	3.76108	0.392381	5.9	6.3	61.95	0	16	1	49.1	161.4	18.8484	2	6.4	7.2	7.1	62.8	0	0.389095	#NULL!	13.6	13.5	13.0858	1	#NULL!	#NULL!	0	104	79	#NULL!	#NULL!
50006	15.0144	2	1	157.5	45.25	18.2414	2	19.45	20.3921	11.55	7.9	61.1	0	0.387937	46	157.8	18.4733	2	16.7	16.0854	0.375158	11.4	10.9	59.45	0	16	2	45.1	156.95	18.3085	1	9.9	8.6	8.4	58.55	0	0.373049	#NULL!	18.5	18.3	17.4854	1	14	#NULL!	#NULL!	102	62	#NULL!	#NULL!
50007	15.4825	1	1	166.55	54.4	19.6114	2	16.5	10.987	8.3	8.2	63.8	0	0.383068	#NULL!	#NULL!	#NULL!	#NULL!	#NULL!	#NULL!	#NULL!	#NULL!	#NULL!	#NULL!	#NULL!	#NULL!	#NULL!	#NULL!	#NULL!	#NULL!	#NULL!	#NULL!	#NULL!	#NULL!	#NULL!	#NULL!	#NULL!	#NULL!	#NULL!	#NULL!	#NULL!	1	#NULL!	#NULL!	0	105	72	#NULL!	#NULL!
50008	13.6619	2	1	149	44.05	19.8414	2	18.2	18.9	8.2	10	62.15	0	0.417114	47	150.95	20.6268	2	18.7	17.825	0.429281	8.9	12.1	65.2	0	15	2	46.6	150.2	20.656	2	12	11.4	11.4	64.8	0	0.431425	#NULL!	23.4	23.4	21.5037	1	12	#NULL!	#NULL!	124	78	#NULL!	#NULL!
50009	15.3046	1	1	158.4	72.2	28.7758	3	56.6	36.0575	25.05	31.55	90.4	2	0.570707	71	159.6	27.8736	3	32.5	24.075	0.550125	12.7	23.3	87.85	2	17	1	79.5	161	30.6701	3	24.5	31	31.05	94.25	2	0.585404	#NULL!	55.5	55.55	40.0303	1	#NULL!	#NULL!	14	100	80	#NULL!	#NULL!
50010	15.0664	2	1	152.4	45.5	19.5903	2	24.7	21.0661	13.6	11.1	63.9	0	0.419291	49	152.75	21.0007	2	17.5	16.7938	0.414403	16.5	11	63.25	0	#NULL!	#NULL!	#NULL!	#NULL!	#NULL!	#NULL!	#NULL!	#NULL!	#NULL!	#NULL!	#NULL!	#NULL!	#NULL!	#NULL!	#NULL!	#NULL!	2	#NULL!	#NULL!	14	110	68	#NULL!	#NULL!
50012	14.9925	2	1	152.4	44.2	19.0306	2	21.8	19.697	12.1	9.7	67.5	0	0.442913	49.9	154.65	20.8642	2	19	18.077	0.42677	12.5	12.8	65.85	0	16	2	53.2	156.6	21.6934	2	14.2	12.6	12.7	68.55	0	0.437739	#NULL!	26.8	26.9	23.8701	1	#NULL!	#NULL!	14	108	70	#NULL!	#NULL!
50013	15.3265	2	1	144.9	43.2	20.5753	2	23.9	30.5	13.9	10	68.75	0	0.474465	46.5	148.05	21.2147	2	18.7	17.825	0.446471	16.4	11.9	66.35	0	#NULL!	#NULL!	#NULL!	#NULL!	#NULL!	#NULL!	#NULL!	#NULL!	#NULL!	#NULL!	#NULL!	#NULL!	#NULL!	#NULL!	#NULL!	#NULL!	1	#NULL!	#NULL!	14	108	76	#NULL!	#NULL!
50014	15.8686	2	1	153.9	41	17.3104	1	23	24.1512	12.8	10.2	61.35	0	0.398635	41.8	155.3	17.3314	1	16.3	15.725	0.387637	11.1	9.7	60.1	0	17	2	41.9	155.4	17.3505	1	10.3	10.4	10.1	60.6	0	0.389961	#NULL!	20.7	20.4	19.2219	1	0	#NULL!	#NULL!	110	70	#NULL!	#NULL!
50015	15.8686	2	1	150.55	41.6	18.354	2	20.6	21.6833	9.5	11.1	64.9	0	0.431086	46.7	151.05	20.468	2	23.3	21.4314	0.429659	14.9	16.1	65.25	0	17	2	48.55	152	21.0137	2	16.9	19.4	19.3	67.8	0	0.446053	#NULL!	36.3	36.2	29.4652	1	0	#NULL!	#NULL!	100	70	#NULL!	#NULL!
50017	14.4148	1	1	168.7	55.8	19.6067	2	17.7	12.1107	9.2	8.5	65.75	0	0.389745	#NULL!	#NULL!	#NULL!	#NULL!	#NULL!	#NULL!	#NULL!	#NULL!	#NULL!	#NULL!	#NULL!	#NULL!	#NULL!	#NULL!	#NULL!	#NULL!	#NULL!	#NULL!	#NULL!	#NULL!	#NULL!	#NULL!	#NULL!	#NULL!	#NULL!	#NULL!	#NULL!	1	#NULL!	#NULL!	12	104	79	#NULL!	#NULL!
50021	15.0144	2	1	163.7	48.9	18.2478	2	21.9	27.9978	13.2	8.7	60.7	0	0.3708	53.1	164.2	19.6946	2	14.4	13.9563	0.375152	17.9	8.2	61.45	0	16	2	50.7	164.9	18.6452	2	14.2	7.6	7.7	59.4	0	0.360218	#NULL!	21.8	21.9	20.3921	1	11	#NULL!	#NULL!	102	80	#NULL!	#NULL!
50024	14.6092	2	1	156.4	56.8	23.2207	2	28.4	26.393	16.2	12.2	69.2	0	0.442455	60.8	155.3	25.2093	3	20.9	19.6185	0.430135	20.4	11.1	67.3	0	16	2	70.1	156.6	28.5848	3	25.4	17.6	17.5	71.1	0	0.454023	#NULL!	43	42.9	33.1234	2	13	#NULL!	#NULL!	102	80	#NULL!	#NULL!
50028	14.0643	2	1	154.6	49.6	20.7521	2	44.8	34.1608	29	15.8	67.45	0	0.436287	48.65	155.45	20.1327	2	25	22.625	0.432293	25.9	14.4	67.05	0	#NULL!	#NULL!	#NULL!	#NULL!	#NULL!	#NULL!	#NULL!	#NULL!	#NULL!	#NULL!	#NULL!	#NULL!	#NULL!	#NULL!	#NULL!	#NULL!	2	13	#NULL!	#NULL!	105	80	#NULL!	#NULL!
50029	15.3101	2	1	152.5	39.6	17.0277	1	20.1	17.9933	10.5	9.6	62.25	0	0.408197	#NULL!	#NULL!	#NULL!	#NULL!	#NULL!	#NULL!	#NULL!	#NULL!	#NULL!	#NULL!	#NULL!	#NULL!	#NULL!	#NULL!	#NULL!	#NULL!	#NULL!	#NULL!	#NULL!	#NULL!	#NULL!	#NULL!	#NULL!	#NULL!	#NULL!	#NULL!	#NULL!	1	12	#NULL!	#NULL!	138	70	#NULL!	#NULL!
50030	14.5024	2	1	155.1	58.55	24.339	2	37.75	30.3115	21.95	15.8	66.85	0	0.431012	51.9	156.85	21.0959	2	16.5	15.9058	0.385081	18.4	9.3	60.3	0	#NULL!	#NULL!	#NULL!	#NULL!	#NULL!	#NULL!	#NULL!	#NULL!	#NULL!	#NULL!	#NULL!	#NULL!	#NULL!	#NULL!	#NULL!	#NULL!	1	12	#NULL!	#NULL!	100	74	#NULL!	#NULL!
50031	15.3785	2	1	165	59.4	21.8182	2	25	23.7752	15.3	9.7	64.8	0	0.392727	59.2	166.05	21.4706	2	14.5	14.0517	0.382415	13.6	9.1	64	0	17	2	58.95	164.8	21.7055	2	9.7	9.8	9.4	64.95	0	0.394114	#NULL!	19.5	19.1	18.1605	1	12	#NULL!	#NULL!	102	70	#NULL!	#NULL!
50032	14.4394	1	1	168.9	56.8	19.9108	2	22	15.948	11.9	10.1	65.6	0	0.388396	55.8	171.3	19.016	2	11.8	6.36408	0.384121	8.5	7.4	65.95	0	#NULL!	#NULL!	#NULL!	#NULL!	#NULL!	#NULL!	#NULL!	#NULL!	#NULL!	#NULL!	#NULL!	#NULL!	#NULL!	#NULL!	#NULL!	#NULL!	1	#NULL!	#NULL!	13	90	60	#NULL!	#NULL!
50033	14.2149	1	1	160	42.45	16.582	1	12.7	7.27668	6.3	6.4	62.15	0	0.388437	46.8	166.65	16.8514	1	7.9	2.25972	0.370237	4.55	5.5	61.75	0	16	1	53.15	173.35	17.6871	1	5.6	7.6	7.6	65.6	0	0.378425	#NULL!	13.2	13.2	12.7909	1	#NULL!	#NULL!	0	120	70	#NULL!	#NULL!
50035	15.4689	2	1	156.5	54.25	22.1499	2	24.1	24.4877	13.7	10.4	71.15	0	0.454633	58	156.8	23.5904	2	22.1	20.5437	0.454719	12.1	11.9	71.35	0	17	2	59.6	154.65	24.9199	2	13.6	13.8	13.9	72.75	0	0.470417	#NULL!	27.4	27.5	24.2438	1	12	#NULL!	#NULL!	100	70	#NULL!	#NULL!
50036	15.8768	2	1	168.1	63.8	22.578	2	45.4	34.4884	22.2	23.2	74.9	0	0.445568	63.2	167.1	22.6341	2	31.5	26.4958	0.432675	23.1	20.5	72.4	0	17	2	65.2	167.35	23.2807	2	19.7	21.4	21.2	72.95	0	0.435913	#NULL!	41.1	40.9	32.0314	#NULL!	#NULL!	#NULL!	#NULL!	138	84	#NULL!	#NULL!
50037	14.3765	2	1	140.4	38.8	19.6833	2	16	21.5037	7.7	8.3	62.2	0	0.44302	40.8	141.45	20.3917	2	12.2	11.7911	0.439024	8.4	8.8	62.55	0	16	2	44.2	143.5	21.4644	2	12.2	11.4	11.6	61.45	0	0.428223	#NULL!	23.6	23.8	21.7903	1	14	#NULL!	#NULL!	120	74	#NULL!	#NULL!
50038	14.8063	2	1	152.7	75.1	32.2079	3	68.95	47.3467	29.9	39.05	94.75	2	0.620498	78.8	153.25	33.5525	3	45	31.025	0.626427	32.3	32	95.7	2	#NULL!	#NULL!	#NULL!	#NULL!	#NULL!	#NULL!	#NULL!	#NULL!	#NULL!	#NULL!	#NULL!	#NULL!	#NULL!	#NULL!	#NULL!	#NULL!	2	#NULL!	#NULL!	#NULL!	110	88	#NULL!	#NULL!
50039	15.9863	1	1	156	44.4	18.2446	2	13.1	7.67812	6.8	6.3	63.65	0	0.408013	46.7	162.95	17.5877	2	8.1	2.47612	0.395827	5.1	5.1	64.35	0	17	1	52.45	166.3	18.9654	2	6.35	6.2	6.1	66.3	0	0.398677	#NULL!	12.55	12.45	12.0435	1	#NULL!	#NULL!	0	100	80	#NULL!	#NULL!
50040	15.3977	2	1	164.3	56.6	20.9672	2	28.3	22.3854	15.4	12.9	67.55	0	0.411138	62.4	165	22.9201	2	22.9	21.1397	0.42303	14.9	13.5	69.45	0	17	2	72.05	164.85	26.5128	3	21.8	18.2	17.6	74.5	0	0.451926	#NULL!	40	39.4	31.2124	1	14	#NULL!	#NULL!	148	80	#NULL!	#NULL!
50041	15.8604	2	1	148.9	42.2	19.0337	2	22.2	19.7753	10.2	12	61	0	0.409671	45.5	148.4	20.6606	2	22.5	20.8438	0.413073	11.4	15.5	61.05	0	17	2	47	149	21.1702	2	10.6	17.4	17.3	61.85	0	0.415101	#NULL!	28	27.9	24.4877	1	12	#NULL!	#NULL!	120	70	#NULL!	#NULL!
50042	15.7481	1	1	168.6	87.4	30.7465	3	51.7	34.3739	25.35	26.35	88.35	1	0.524021	#NULL!	#NULL!	#NULL!	#NULL!	#NULL!	#NULL!	#NULL!	#NULL!	#NULL!	#NULL!	#NULL!	#NULL!	#NULL!	#NULL!	#NULL!	#NULL!	#NULL!	#NULL!	#NULL!	#NULL!	#NULL!	#NULL!	#NULL!	#NULL!	#NULL!	#NULL!	#NULL!	1	#NULL!	#NULL!	14	100	60	#NULL!	#NULL!
50043	15.0938	1	1	166	54.3	19.7053	2	15.2	9.74368	7.5	7.7	68	0	0.409639	55.75	166.4	20.1344	2	10.45	4.97088	0.403245	6.5	7.25	67.25	0	18	1	55.4	166.55	19.972	2	6.1	7.6	7.6	69.5	0	0.417292	#NULL!	13.7	13.7	13.281	1	#NULL!	#NULL!	14	100	50	#NULL!	#NULL!
50045	15.3648	2	1	160.2	61.3	23.8856	2	44.9	34.2154	26.7	18.2	70.05	0	0.437266	#NULL!	#NULL!	#NULL!	#NULL!	#NULL!	#NULL!	#NULL!	#NULL!	#NULL!	#NULL!	#NULL!	#NULL!	#NULL!	#NULL!	#NULL!	#NULL!	#NULL!	#NULL!	#NULL!	#NULL!	#NULL!	#NULL!	#NULL!	#NULL!	#NULL!	#NULL!	#NULL!	2	#NULL!	#NULL!	#NULL!	149	80	#NULL!	#NULL!
50046	15.9261	2	1	155.1	52	21.6162	2	38.65	30.8029	21.95	16.7	71.55	0	0.461315	53.1	155	22.102	2	26.1	23.3573	0.42	19.4	16.1	65.15	0	17	2	54.6	155.85	22.4791	2	17.8	19.6	19.8	67.15	0	0.430863	#NULL!	37.4	37.6	30.2296	#NULL!	#NULL!	#NULL!	#NULL!	100	80	#NULL!	#NULL!
50047	16.2409	2	1	160.6	49	18.9979	2	22.7	29.6285	14.4	8.3	61.7	0	0.384184	#NULL!	#NULL!	#NULL!	#NULL!	#NULL!	#NULL!	#NULL!	#NULL!	#NULL!	#NULL!	#NULL!	#NULL!	#NULL!	#NULL!	#NULL!	#NULL!	#NULL!	#NULL!	#NULL!	#NULL!	#NULL!	#NULL!	#NULL!	#NULL!	#NULL!	#NULL!	#NULL!	2	14	#NULL!	#NULL!	102	74	#NULL!	#NULL!
50048	15.1266	2	1	150.6	50.2	22.1337	2	32	28.9497	16	16	66.3	0	0.440239	53.7	150.2	23.8031	2	34.6	27.9549	0.458722	18.7	25.2	68.4	0	17	2	56.6	151.25	24.7415	2	19.9	30.6	31.1	70.7	0	0.467438	#NULL!	50.5	51	37.546	2	12	#NULL!	#NULL!	90	62	#NULL!	#NULL!
50049	16.2053	2	1	161.9	71.5	27.278	3	41.1	32.1406	24.1	17	78.85	1	0.487029	#NULL!	#NULL!	#NULL!	#NULL!	#NULL!	#NULL!	#NULL!	#NULL!	#NULL!	#NULL!	#NULL!	#NULL!	#NULL!	#NULL!	#NULL!	#NULL!	#NULL!	#NULL!	#NULL!	#NULL!	#NULL!	#NULL!	#NULL!	#NULL!	#NULL!	#NULL!	#NULL!	1	12	#NULL!	#NULL!	110	80	#NULL!	#NULL!
50051	15.9097	2	1	156.6	48.6	19.8177	2	20.1	24.3662	11.3	8.8	62.3	0	0.397829	49.9	157.05	20.2313	2	14	13.572	0.407514	9.3	8.8	63.5	0	17	2	48.25	157.35	19.4878	2	7.1	7.8	8.1	62.25	0	0.395615	#NULL!	14.9	15.2	14.7125	1	14	#NULL!	#NULL!	110	70	#NULL!	#NULL!
50053	15.7426	2	1	149.9	49.1	21.8513	2	19	16.8811	10.1	8.9	65.35	0	0.435957	44	151.4	19.1956	2	16.1	15.5433	0.416116	10.4	10.3	62.75	0	#NULL!	#NULL!	#NULL!	#NULL!	#NULL!	#NULL!	#NULL!	#NULL!	#NULL!	#NULL!	#NULL!	#NULL!	#NULL!	#NULL!	#NULL!	#NULL!	1	0	#NULL!	#NULL!	100	60	#NULL!	#NULL!
50054	15.3265	2	1	154.8	42.2	17.6105	2	22.8	18.3266	14	8.8	62.5	0	0.403747	46.9	154.1	19.75	2	15.8	15.2687	0.393251	16.5	9.4	61.1	0	16	2	48.25	154.25	20.279	2	11.7	9.8	9.4	63	0	0.408428	#NULL!	21.5	21.1	19.7753	1	14	#NULL!	#NULL!	98	59	#NULL!	#NULL!
50055	15.2361	2	1	159.9	64.9	25.3833	3	32.3	12.8894	19.5	12.8	66.25	0	0.414321	66.7	160.6	25.8604	3	24	21.932	0.408468	18.1	15	65.2	0	16	2	67.9	161.2	26.13	3	20	14.2	14.1	66	0	0.409429	#NULL!	34.2	34.1	27.7365	1	14	#NULL!	#NULL!	100	50	#NULL!	#NULL!
50056	14.5982	1	1	155	47.7	19.8543	2	16.8	11.2701	9.3	7.5	64.25	0	0.414516	52.3	161.2	20.1267	2	9.8	4.28968	0.409429	6.9	6.2	65.95	0	#NULL!	#NULL!	#NULL!	#NULL!	#NULL!	#NULL!	#NULL!	#NULL!	#NULL!	#NULL!	#NULL!	#NULL!	#NULL!	#NULL!	#NULL!	#NULL!	1	#NULL!	#NULL!	0	#NULL!	#NULL!	#NULL!	#NULL!
50057	13.3717	2	1	158.6	45.3	18.0091	2	17.8	11.588	10.8	7	60.8	0	0.383354	47.5	159.5	18.6712	2	12.7	12.2942	0.377429	12.4	7.7	59.95	0	15	2	50.8	160.6	19.6958	2	13.5	8.6	9	59.55	0	0.370797	#NULL!	22.1	22.5	20.8438	1	13	#NULL!	#NULL!	#NULL!	#NULL!	#NULL!	#NULL!
50058	14.6639	2	1	148.5	52.1	23.6257	2	32.8	10.4001	21.7	11.1	69.45	0	0.467677	56.3	151.15	24.6429	2	26.3	23.487	0.457162	19.5	15.5	68.8	0	16	2	59.6	148.15	27.1546	3	18.3	16	16.4	72.35	0	0.488356	#NULL!	34.3	34.7	27.9978	1	14	#NULL!	#NULL!	#NULL!	#NULL!	#NULL!	#NULL!
50059	13.4374	1	1	143.7	30.3	14.6733	1	10.5	5.023	6.1	4.4	54.3	0	0.377871	34.8	151.3	15.202	1	8.5	2.907	0.370126	5.4	4.7	56.4	0	#NULL!	#NULL!	#NULL!	#NULL!	#NULL!	#NULL!	#NULL!	#NULL!	#NULL!	#NULL!	#NULL!	#NULL!	#NULL!	#NULL!	#NULL!	#NULL!	1	#NULL!	#NULL!	0	#NULL!	#NULL!	#NULL!	#NULL!
50060	14.5435	2	1	150.5	40.6	17.9247	2	16.9	14.2418	8.1	8.8	58.55	0	0.389037	#NULL!	#NULL!	#NULL!	#NULL!	#NULL!	#NULL!	#NULL!	#NULL!	#NULL!	#NULL!	#NULL!	#NULL!	#NULL!	#NULL!	#NULL!	#NULL!	#NULL!	#NULL!	#NULL!	#NULL!	#NULL!	#NULL!	#NULL!	#NULL!	#NULL!	#NULL!	#NULL!	2	0	#NULL!	#NULL!	#NULL!	#NULL!	#NULL!	#NULL!
50062	13.5031	1	1	150.8	44.3	19.4805	2	13.5	8.077	7.2	6.3	66.2	0	0.438992	#NULL!	#NULL!	#NULL!	#NULL!	#NULL!	#NULL!	#NULL!	#NULL!	#NULL!	#NULL!	#NULL!	#NULL!	#NULL!	#NULL!	#NULL!	#NULL!	#NULL!	#NULL!	#NULL!	#NULL!	#NULL!	#NULL!	#NULL!	#NULL!	#NULL!	#NULL!	#NULL!	2	#NULL!	#NULL!	0	#NULL!	#NULL!	#NULL!	#NULL!
50063	13.4456	2	1	158.5	39.2	15.6037	1	13	16.2641	7.9	5.1	58.2	0	0.367192	42.6	160.6	16.5165	1	10.1	9.60687	0.348692	11.4	6.1	56.15	0	15	2	45.85	161.85	17.5031	1	11.7	6.2	6.15	58.8	0	0.363299	#NULL!	17.9	17.85	17.0984	2	14	#NULL!	#NULL!	#NULL!	#NULL!	#NULL!	#NULL!
50064	13.9795	2	1	158.1	48.3	19.3234	2	29.1	10.869	19.5	9.6	61.55	0	0.389311	48	157.2	19.4239	2	16.2	15.6343	0.382316	15.3	9.6	59.95	0	#NULL!	#NULL!	#NULL!	#NULL!	#NULL!	#NULL!	#NULL!	#NULL!	#NULL!	#NULL!	#NULL!	#NULL!	#NULL!	#NULL!	#NULL!	#NULL!	2	9	#NULL!	#NULL!	#NULL!	#NULL!	#NULL!	#NULL!
50065	14.2587	1	1	164.05	47.9	17.7985	2	13.3	7.87788	7.3	6	63.3	0	0.385858	#NULL!	#NULL!	#NULL!	#NULL!	#NULL!	#NULL!	#NULL!	#NULL!	#NULL!	#NULL!	#NULL!	#NULL!	#NULL!	#NULL!	#NULL!	#NULL!	#NULL!	#NULL!	#NULL!	#NULL!	#NULL!	#NULL!	#NULL!	#NULL!	#NULL!	#NULL!	#NULL!	1	#NULL!	#NULL!	0	#NULL!	#NULL!	#NULL!	#NULL!
50066	14.3409	2	1	143.5	32.3	15.6855	1	15.2	9.81983	8.5	6.7	53.7	0	0.374216	#NULL!	#NULL!	#NULL!	#NULL!	#NULL!	#NULL!	#NULL!	#NULL!	#NULL!	#NULL!	#NULL!	#NULL!	#NULL!	#NULL!	#NULL!	#NULL!	#NULL!	#NULL!	#NULL!	#NULL!	#NULL!	#NULL!	#NULL!	#NULL!	#NULL!	#NULL!	#NULL!	#NULL!	#NULL!	#NULL!	#NULL!	#NULL!	#NULL!	#NULL!	#NULL!
50067	13.6372	2	1	162.8	58.35	22.0157	2	30.5	15.4063	16.7	13.8	69.45	0	0.426597	58.9	162.1	22.4155	2	24.1	22.0025	0.586058	21.9	13.1	95.1	0	15	2	65.2	163.65	24.3453	2	22.4	18.4	17.9	72.8	0	0.444852	#NULL!	40.8	40.3	31.7038	1	12	#NULL!	#NULL!	#NULL!	#NULL!	#NULL!	#NULL!
50068	14.4038	2	1	158.4	41.7	16.6198	1	18.7	10.869	11.2	7.5	59.8	0	0.377525	46.4	160.2	18	2	19.4	18.4093	3.70988	17.4	10.2	59.55	0	#NULL!	#NULL!	#NULL!	#NULL!	#NULL!	#NULL!	#NULL!	#NULL!	#NULL!	#NULL!	#NULL!	#NULL!	#NULL!	#NULL!	#NULL!	#NULL!	1	14	#NULL!	#NULL!	#NULL!	#NULL!	#NULL!	#NULL!
50069	13.5387	2	1	148.7	52.05	23.5396	2	37.8	30.3388	21.2	16.6	71.8	0	0.482851	57.5	149	25.8997	3	28.5	24.8458	0.493289	25.4	17.5	72.85	0	15	2	62.95	153.5	26.7165	3	20.1	22	21.9	74.45	0	0.485016	#NULL!	42.1	42	32.632	1	0	#NULL!	#NULL!	#NULL!	#NULL!	#NULL!	#NULL!
50070	14.6804	2	1	157.6	60	24.1568	2	32.5	17.3999	16.6	15.9	69.7	0	0.442259	60.1	155.65	24.8071	2	22	20.468	0.436235	15.8	14.8	67.75	0	16	2	64.1	157.3	25.906	3	17.3	17.8	18.3	69.45	0	0.441513	#NULL!	35.1	35.6	29.1376	1	#NULL!	#NULL!	#NULL!	#NULL!	#NULL!	#NULL!	#NULL!
50071	14.8364	2	1	153.6	39.9	16.9118	1	28.2	13.572	16.2	12	55.5	0	0.361328	#NULL!	#NULL!	#NULL!	#NULL!	#NULL!	#NULL!	#NULL!	#NULL!	#NULL!	#NULL!	#NULL!	#NULL!	#NULL!	#NULL!	#NULL!	#NULL!	#NULL!	#NULL!	#NULL!	#NULL!	#NULL!	#NULL!	#NULL!	#NULL!	#NULL!	#NULL!	#NULL!	2	12	#NULL!	#NULL!	#NULL!	#NULL!	#NULL!	#NULL!
60001	15.2225	1	1	171.7	67.1	22.7605	2	16.9	11.3641	9.4	7.5	70.9	0	0.41293	70.4	175	22.9878	2	13.4	7.97752	0.405143	9.6	7.6	70.85	0	17	1	75	177.8	23.7245	2	11.05	7.4	7.5	73.85	0	0.415354	1	18.45	18.55	17.6982	1	#NULL!	#NULL!	13	118	74	112	0
60002	14.7296	1	1	154.6	49.1	20.5429	2	27.7	20.5787	15.7	12	62.6	0	0.404916	48.35	155.4	20.0214	2	19.8	18.7375	0.379022	14.6	12	59.1	0	16	0	52.6	155.1	21.8656	2	16.8	14.4	14.1	63.75	0	0.411025	1	31.2	30.9	26.1845	1	14	#NULL!	#NULL!	109	72	98	0
60003	16.0821	2	1	158.6	42.5	16.8959	1	18.6	27.2366	11.1	7.5	58.3	0	0.367591	45.7	159.7	17.9187	2	19.5	18.4918	0.372574	11.5	10.5	59.75	0	18	2	44.7	163.4	16.7418	1	8.8	8.8	8.4	58.8	0	0.359853	1	17.6	17.2	16.5301	1	14	#NULL!	#NULL!	101	71	100	0
60005	15.822	2	1	163.1	60.6	22.7806	2	29.7	19.1017	19.3	10.4	68.25	0	0.418455	61.5	161.3	23.6378	2	22.3	20.6942	0.418475	23.2	12.9	67.25	0	17	2	67.1	162.25	25.489	3	18.2	12.8	12.5	76.25	0	0.469954	1	31	30.7	26.0786	1	14	#NULL!	#NULL!	122	64	100	0
60009	15.8823	2	1	158.6	60.1	23.8929	2	36.5	29.629	23.1	13.4	70.2	0	0.442623	#NULL!	#NULL!	#NULL!	#NULL!	#NULL!	#NULL!	#NULL!	#NULL!	#NULL!	#NULL!	#NULL!	#NULL!	#NULL!	#NULL!	#NULL!	#NULL!	#NULL!	#NULL!	#NULL!	#NULL!	#NULL!	#NULL!	#NULL!	1	#NULL!	#NULL!	#NULL!	1	14	#NULL!	#NULL!	102	68	100	0
60010	15.3238	2	1	159.5	47.1	18.514	2	18.8	31.5146	11.6	7.2	63.25	0	0.396552	48.25	159.8	18.8949	2	12.3	11.8922	0.377347	10.9	7.3	60.2	0	16	2	50.1	161.2	19.28	2	12.5	7.2	7.1	60.3	0	0.374069	1	19.7	19.6	18.5739	#NULL!	#NULL!	#NULL!	#NULL!	90	62	98	0
60011	14.6557	2	1	154.4	37.6	15.7722	1	16.1	31.4602	10.4	5.7	52.3	0	0.338731	#NULL!	#NULL!	#NULL!	#NULL!	#NULL!	#NULL!	#NULL!	#NULL!	#NULL!	#NULL!	#NULL!	#NULL!	#NULL!	#NULL!	#NULL!	#NULL!	#NULL!	#NULL!	#NULL!	#NULL!	#NULL!	#NULL!	#NULL!	1	#NULL!	#NULL!	#NULL!	#NULL!	#NULL!	#NULL!	#NULL!	106	80	120	1
60013	16.0465	1	1	164.2	50.4	18.6932	2	14.7	9.25828	6.9	7.8	62.35	0	0.37972	52.9	165.05	19.4189	2	11.5	6.057	0.388973	6.2	8.5	64.1	0	18	1	53.55	166.25	19.3748	2	7	8.2	8.2	65.25	0	0.392481	1	15.2	15.2	14.7125	1	#NULL!	#NULL!	14	110	70	110	0
60015	15.0198	2	1	157.9	55.3	22.18	2	30.7	24.7571	16.6	14.1	70.9	0	0.449018	#NULL!	#NULL!	#NULL!	#NULL!	#NULL!	#NULL!	#NULL!	#NULL!	#NULL!	#NULL!	#NULL!	#NULL!	#NULL!	#NULL!	#NULL!	#NULL!	#NULL!	#NULL!	#NULL!	#NULL!	#NULL!	#NULL!	#NULL!	1	#NULL!	#NULL!	#NULL!	#NULL!	#NULL!	#NULL!	#NULL!	102	80	118	1
60016	14.412	2	1	149.2	36.7	16.4865	1	14.85	30.7868	10.1	4.75	55.3	0	0.370643	#NULL!	#NULL!	#NULL!	#NULL!	#NULL!	#NULL!	#NULL!	#NULL!	#NULL!	#NULL!	#NULL!	15	2	43.4	150.2	19.2376	2	12.7	9.6	9.3	57.9	0	0.385486	1	22.3	22	20.468	1	13	#NULL!	#NULL!	88	62	100	0
60017	15.3046	2	1	157.4	56.7	22.8862	2	36.2	29.4652	17.2	19	70.1	0	0.445362	#NULL!	#NULL!	#NULL!	#NULL!	#NULL!	#NULL!	#NULL!	#NULL!	#NULL!	#NULL!	#NULL!	#NULL!	#NULL!	#NULL!	#NULL!	#NULL!	#NULL!	#NULL!	#NULL!	#NULL!	#NULL!	#NULL!	#NULL!	1	#NULL!	#NULL!	#NULL!	1	14	#NULL!	#NULL!	105	74	104	0
60020	15.5346	2	1	155.5	42.95	17.7624	2	18.9	30.3799	11.05	7.85	60.65	0	0.390032	#NULL!	#NULL!	#NULL!	#NULL!	#NULL!	#NULL!	#NULL!	#NULL!	#NULL!	#NULL!	#NULL!	#NULL!	#NULL!	#NULL!	#NULL!	#NULL!	#NULL!	#NULL!	#NULL!	#NULL!	#NULL!	#NULL!	#NULL!	1	#NULL!	#NULL!	#NULL!	1	14	#NULL!	#NULL!	108	72	108	0
60022	15.373	1	1	155.1	41.6	17.293	1	10.85	5.38672	5.8	5.05	62.6	0	0.403611	45.9	159.7	17.9971	2	9.6	4.07872	0.416406	5.8	6	66.25	0	17	1	49.2	160.35	19.1349	2	6.2	6	6.1	66.65	0	0.415653	1	12.2	12.3	11.8922	1	#NULL!	#NULL!	0	110	60	106	0
60025	15.3265	1	1	163.5	48	17.9558	2	12	6.568	5.55	6.45	65.7	0	0.401835	#NULL!	#NULL!	#NULL!	#NULL!	#NULL!	#NULL!	#NULL!	#NULL!	#NULL!	#NULL!	#NULL!	#NULL!	#NULL!	#NULL!	#NULL!	#NULL!	#NULL!	#NULL!	#NULL!	#NULL!	#NULL!	#NULL!	#NULL!	1	#NULL!	#NULL!	#NULL!	2	#NULL!	#NULL!	14	112	84	112	0
60026	14.9158	2	1	155.3	65.5	27.158	3	40.5	31.813	26.2	14.3	72.75	0	0.468448	66.3	156.8	26.9663	3	26.2	23.4223	0.446429	21.3	13.4	70.15	0	16	2	64.4	158.7	25.5701	3	15.8	12	12.1	68.25	0	0.430057	1	27.8	27.9	24.4877	1	13	#NULL!	#NULL!	122	60	112	0
60027	15.4825	2	1	156.7	55	22.3988	2	29.5	30.1258	17.4	12.1	68.15	0	0.434907	52	153.8	21.9832	2	18.4	17.5707	0.418726	14.5	10.4	64.2	0	17	2	52.3	156.9	21.245	2	12.8	10.6	10.3	64.55	0	0.411409	1	23.4	23.1	21.2861	1	13	#NULL!	#NULL!	106	72	88	0
60029	15.3046	2	1	156.7	69.7	28.3854	3	68.85	47.2921	32.85	36	79.65	1	0.508296	#NULL!	#NULL!	#NULL!	#NULL!	#NULL!	#NULL!	#NULL!	#NULL!	#NULL!	#NULL!	#NULL!	#NULL!	#NULL!	#NULL!	#NULL!	#NULL!	#NULL!	#NULL!	#NULL!	#NULL!	#NULL!	#NULL!	#NULL!	1	#NULL!	#NULL!	#NULL!	#NULL!	#NULL!	#NULL!	#NULL!	100	70	102	0
60030	15.3183	2	1	159.5	68.9	27.0831	3	41.35	32.2771	23.6	17.75	74.75	0	0.468652	70.8	161	27.3138	3	26.7	23.7434	0.454037	22.7	15.5	73.15	0	17	2	75.1	161.75	28.7046	3	20.7	15.8	15.5	79.25	1	0.489954	1	36.5	36.2	29.4652	2	13	#NULL!	#NULL!	100	74	90	0
60031	15.0609	1	1	165.2	43.4	15.9027	1	11.3	5.85148	6.3	5	63	0	0.381356	48.9	172.8	16.3765	1	8.8	3.22848	0.366898	6	5.6	63.2	0	17	1	52.5	177.1	16.7387	1	6.1	6	6.1	63.7	0	0.359684	1	12.1	12.2	11.7911	#NULL!	#NULL!	#NULL!	#NULL!	124	68	104	0
60032	14.4586	1	1	163.5	49.6	18.5544	2	13.3	7.87788	5.8	7.5	64.75	0	0.396024	50.7	164.15	18.816	2	9.8	4.28968	0.404508	5.1	6.8	65.95	0	16	1	52.8	166.5	19.0461	2	5.4	7.2	7.3	67.25	0	0.403904	1	12.6	12.7	12.2942	1	#NULL!	#NULL!	13	100	60	100	0
60033	14.204	2	1	152	47.7	20.6458	2	33.6	31.5119	18.9	14.7	62.15	0	0.408882	#NULL!	#NULL!	#NULL!	#NULL!	#NULL!	#NULL!	#NULL!	#NULL!	#NULL!	#NULL!	#NULL!	#NULL!	#NULL!	#NULL!	#NULL!	#NULL!	#NULL!	#NULL!	#NULL!	#NULL!	#NULL!	#NULL!	#NULL!	1	#NULL!	#NULL!	#NULL!	#NULL!	#NULL!	#NULL!	#NULL!	100	74	108	0
60034	15.1896	2	1	164.6	52.05	19.2115	2	18.5	19.5397	11.1	7.4	61.95	0	0.376367	57.5	165.5	20.9929	2	16.7	16.0854	0.377644	14.2	8.3	62.15	0	17	2	60.05	165.95	21.8051	2	14.2	9.4	8.9	66.3	0	0.399518	1	23.6	23.1	21.2861	1	13	#NULL!	#NULL!	114	64	104	0
60035	14.7926	2	1	167.5	47.4	16.8946	1	19.15	20.0858	10.05	9.1	62.75	0	0.374627	48.6	168.1	17.1989	1	19.3	18.3266	0.368828	9.7	10.1	61.7	0	16	2	51.9	168.5	18.2796	1	11.6	14.6	14.2	64.4	0	0.382196	1	26.2	25.8	23.1607	1	13	#NULL!	#NULL!	124	68	100	0
60036	14.5216	1	1	168.6	49.6	17.4488	1	15.95	10.4643	8.85	7.1	62.4	0	0.370107	#NULL!	#NULL!	#NULL!	#NULL!	#NULL!	#NULL!	#NULL!	#NULL!	#NULL!	#NULL!	#NULL!	#NULL!	#NULL!	#NULL!	#NULL!	#NULL!	#NULL!	#NULL!	#NULL!	#NULL!	#NULL!	#NULL!	#NULL!	1	#NULL!	#NULL!	#NULL!	#NULL!	#NULL!	#NULL!	#NULL!	106	76	110	0
60038	14.6585	2	1	164.4	60.5	22.3847	2	27.9	28.6103	17.2	10.7	71.85	0	0.437044	63.5	164.6	23.4376	2	15.7	15.1766	0.441069	20.7	11.1	72.55	0	16	2	62.7	165.7	22.8361	2	14.3	9.4	9.6	69.55	0	0.419734	1	23.7	23.9	21.8613	1	13	#NULL!	#NULL!	106	81	102	0
60039	15.4387	1	1	169.1	62.7	21.9271	2	19.3	13.5731	8.3	11	74.95	0	0.443229	65	169.3	22.6777	2	16.9	11.3641	0.452451	6.1	11.6	76.5	0	17	1	64.1	170.8	21.9726	2	7.6	13.5	13.45	74.7	0	0.437354	1	21.1	21.05	19.7362	1	#NULL!	#NULL!	11	100	74	104	0
60040	14.5407	1	1	158.1	50.7	20.2836	2	11.3	5.85148	5.6	5.7	65.8	0	0.416192	51.8	158.85	20.5284	2	8	2.368	0.407932	4.55	5.8	64.4	0	16	1	51.9	159.45	20.4135	2	4.7	6	6	64.95	0	0.407338	1	10.7	10.7	10.2426	1	#NULL!	#NULL!	13	100	64	100	0
60044	15.8932	2	1	161.6	56.7	21.712	2	32.3	15.8155	19.7	12.6	69	0	0.42698	56.05	162.1	21.3309	2	21.2	19.8533	0.396669	15	10.8	64.05	0	#NULL!	#NULL!	#NULL!	#NULL!	#NULL!	#NULL!	#NULL!	#NULL!	#NULL!	#NULL!	#NULL!	#NULL!	1	#NULL!	#NULL!	#NULL!	#NULL!	#NULL!	#NULL!	#NULL!	110	90	102	0
60045	14.078	2	1	172.9	53.15	17.7792	2	19.75	24.3662	12.45	7.3	59.85	0	0.346154	#NULL!	#NULL!	#NULL!	#NULL!	#NULL!	#NULL!	#NULL!	#NULL!	#NULL!	#NULL!	#NULL!	15	2	53.3	175.25	17.3545	1	12.2	6.4	6.2	60.4	0	0.34465	1	18.6	18.4	17.5707	1	12	#NULL!	#NULL!	107	91	108	0
60049	14.8966	2	1	158.1	45.7	18.2832	2	29.8	31.4726	16.5	13.3	62.7	0	0.396584	50.9	157.35	20.5582	2	30.5	25.9718	0.404194	18	18.5	63.9	0	16	2	51.75	158.25	20.6644	2	20	20	20.2	65.15	0	0.41169	1	40	40.2	31.6492	1	12	#NULL!	#NULL!	108	64	94	0
60051	14.9185	1	1	162.3	49.7	18.8677	2	10.3	4.81428	4.8	5.5	64.8	0	0.399261	#NULL!	#NULL!	#NULL!	#NULL!	#NULL!	#NULL!	#NULL!	#NULL!	#NULL!	#NULL!	#NULL!	#NULL!	#NULL!	#NULL!	#NULL!	#NULL!	#NULL!	#NULL!	#NULL!	#NULL!	#NULL!	#NULL!	#NULL!	1	#NULL!	#NULL!	#NULL!	1	#NULL!	#NULL!	14	88	62	98	0
60054	13.5031	2	1	155.6	50.2	20.7341	2	27.3	17.5707	17.5	9.8	65.5	0	0.420951	#NULL!	#NULL!	#NULL!	#NULL!	#NULL!	#NULL!	#NULL!	#NULL!	#NULL!	#NULL!	#NULL!	#NULL!	#NULL!	#NULL!	#NULL!	#NULL!	#NULL!	#NULL!	#NULL!	#NULL!	#NULL!	#NULL!	#NULL!	1	#NULL!	#NULL!	#NULL!	1	14	#NULL!	#NULL!	110	70	100	0
60055	15.2115	2	1	156.7	48.3	19.6702	2	27.75	29.9289	17.8	9.95	63.15	0	0.402999	54.1	154.65	22.6203	2	20.1	18.9809	0.42677	20	12.5	65.8	0	17	2	54.55	156.65	22.2297	2	19.3	12.8	12.6	66.5	0	0.424513	1	32.1	31.9	26.6981	1	13	#NULL!	#NULL!	102	64	100	0
60058	16.0684	1	1	167.2	50.8	18.1715	2	15.3	9.84028	7.3	8	64.5	0	0.385766	54.9	169.9	19.0189	2	11.1	5.64532	0.399058	6.8	6.9	67.6	0	17	1	55.05	171.55	18.7058	2	6.2	7.8	7.6	68.25	0	0.397843	1	14	13.8	13.3783	1	#NULL!	#NULL!	0	90	50	110	0
60059	15.1321	2	1	150.6	46.5	20.5023	2	36.3	29.5198	22.4	13.9	64.75	0	0.429947	45.5	150.1	20.1953	2	19.2	18.2437	0.401732	17.4	11	60.75	0	17	2	45.7	150.7	20.1229	2	16.9	10.8	10.8	62.9	0	0.417386	1	27.7	27.7	24.3662	#NULL!	#NULL!	#NULL!	#NULL!	#NULL!	#NULL!	98	0
60060	13.3881	2	1	150.1	43.6	19.352	2	30.3	26.8471	18.1	12.2	62	0	0.413058	49	150.1	21.7488	2	29.3	25.3086	0.417722	19.9	15.7	62.05	0	15	2	51.55	151.5	22.4597	2	19	18.4	18.5	65.15	0	0.430033	1	37.4	37.5	30.175	2	13	#NULL!	#NULL!	#NULL!	#NULL!	104	0
60061	19.9781	2	1	160.2	51.3	19.9891	2	24.5	31.5078	15.1	9.4	63.8	0	0.398252	#NULL!	#NULL!	#NULL!	#NULL!	#NULL!	#NULL!	#NULL!	#NULL!	#NULL!	#NULL!	#NULL!	#NULL!	#NULL!	#NULL!	#NULL!	#NULL!	#NULL!	#NULL!	#NULL!	#NULL!	#NULL!	#NULL!	#NULL!	1	#NULL!	#NULL!	#NULL!	1	13	#NULL!	#NULL!	#NULL!	#NULL!	104	0
60062	14.9487	1	1	155.95	41.8	17.1872	1	14	8.572	7.8	6.2	59.9	0	0.384097	45.7	161.3	17.565	2	10.1	4.60492	0.357099	6.6	6	57.4	0	#NULL!	#NULL!	#NULL!	#NULL!	#NULL!	#NULL!	#NULL!	#NULL!	#NULL!	#NULL!	#NULL!	#NULL!	1	#NULL!	#NULL!	#NULL!	#NULL!	#NULL!	#NULL!	#NULL!	#NULL!	#NULL!	110	0
60063	14.3847	1	1	168.6	46.2	16.2527	1	9.7	4.18428	4.8	4.9	62.75	0	0.372183	#NULL!	#NULL!	#NULL!	#NULL!	#NULL!	#NULL!	#NULL!	#NULL!	#NULL!	#NULL!	#NULL!	#NULL!	#NULL!	#NULL!	#NULL!	#NULL!	#NULL!	#NULL!	#NULL!	#NULL!	#NULL!	#NULL!	#NULL!	1	#NULL!	#NULL!	#NULL!	#NULL!	#NULL!	#NULL!	#NULL!	#NULL!	#NULL!	102	0
60064	14.4997	2	1	164.9	45.7	16.8064	1	17.3	17.4854	10.1	7.2	56.85	0	0.344754	47.8	165.5	17.4515	1	12.2	11.7911	0.34139	11	7.6	56.55	0	#NULL!	#NULL!	#NULL!	#NULL!	#NULL!	#NULL!	#NULL!	#NULL!	#NULL!	#NULL!	#NULL!	#NULL!	1	#NULL!	#NULL!	#NULL!	1	13	#NULL!	#NULL!	#NULL!	#NULL!	92	0
60065	13.0431	2	1	152.5	35	15.0497	1	16.2	17.9933	10.3	5.9	54.35	0	0.356393	40	159.4	15.7428	1	12.5	12.0938	0.342535	8.7	6.7	54.95	0	15	2	44.6	161.8	17.0364	1	12.2	8.2	8.1	57.35	0	0.35445	1	20.4	20.3	19.1418	1	0	#NULL!	#NULL!	#NULL!	#NULL!	98	0
60066	14.9979	1	1	162.4	46.2	17.5174	1	15.8	10.3209	8.3	7.5	64.75	0	0.398707	#NULL!	#NULL!	#NULL!	#NULL!	#NULL!	#NULL!	#NULL!	#NULL!	#NULL!	#NULL!	#NULL!	#NULL!	#NULL!	#NULL!	#NULL!	#NULL!	#NULL!	#NULL!	#NULL!	#NULL!	#NULL!	#NULL!	#NULL!	1	#NULL!	#NULL!	#NULL!	#NULL!	#NULL!	#NULL!	#NULL!	#NULL!	#NULL!	100	0
60067	14.4066	1	1	147.1	32.8	15.1582	1	9.1	3.54852	5	4.1	54.95	0	0.373555	37.7	152.2	16.2747	1	7.3	1.60668	0.403417	4.5	4.1	61.2	0	16	1	41.4	158.6	16.4586	1	4.7	4.6	4.6	59.45	0	0.374842	1	9.3	9.3	8.74463	#NULL!	#NULL!	#NULL!	#NULL!	#NULL!	#NULL!	102	0
60068	13.9357	2	1	144.6	31.4	15.0173	1	19.2	19.931	12.3	6.9	54.3	0	0.375519	51.6	167.65	18.3587	2	11.5	6.057	0.414554	6	7.3	68.8	0	#NULL!	#NULL!	#NULL!	#NULL!	#NULL!	#NULL!	#NULL!	#NULL!	#NULL!	#NULL!	#NULL!	#NULL!	1	#NULL!	24.3	22.1426	1	#NULL!	#NULL!	14	#NULL!	#NULL!	110	0
60069	17.0897	1	1	177.1	63.9	20.3734	2	18.7	13.0295	6.6	12.1	65.5	0	0.369848	63.6	177.3	20.232	2	13.6	8.17632	0.376199	6	9.8	66.4	0	19	1	62.45	177.3	19.8662	2	5.5	12.4	11.8	64.2	0	0.362098	1	17.9	17.3	16.6182	1	14	#NULL!	#NULL!	#NULL!	#NULL!	130	1
60071	13.6372	2	1	158.8	48.6	19.2724	2	25.2	20.7317	12.7	12.5	63.2	0	0.397985	50.9	160.4	19.7838	2	16.8	16.1749	0.405237	13.4	11	65.25	0	#NULL!	#NULL!	#NULL!	#NULL!	#NULL!	#NULL!	#NULL!	#NULL!	#NULL!	#NULL!	#NULL!	#NULL!	1	#NULL!	#NULL!	#NULL!	1	12	#NULL!	#NULL!	#NULL!	#NULL!	100	0
60072	13.2348	2	1	153.1	49.4	21.0754	2	37.5	30.175	20.6	16.9	68.2	0	0.44546	50.5	152.8	21.6294	2	26.1	23.3573	0.437827	19.5	16.3	66.65	0	14	2	49.5	156.4	20.2363	2	14.5	13.6	13.1	66.5	0	0.425192	1	28.1	27.6	24.3051	1	12	#NULL!	#NULL!	#NULL!	#NULL!	96	0
60073	14.5517	2	1	156.4	44.8	18.3149	2	26	14.478	16.8	9.2	60.6	0	0.387468	46	156	18.902	2	18.2	17.3999	0.383333	14.7	10	59.8	0	16	2	47.75	156.3	19.5459	2	13.7	9	9.5	61.75	0	0.395074	1	22.7	23.2	21.3589	#NULL!	#NULL!	#NULL!	#NULL!	#NULL!	#NULL!	90	0
60075	16.0548	1	1	175	65	21.2245	2	18.5	12.847	9.6	8.9	74.75	0	0.427143	69.7	176.3	22.4248	2	13.1	7.67812	0.433352	9.8	9.3	76	0	17	1	72.35	177.9	22.8605	2	10.2	10.1	10.15	75.4	0	0.423834	1	20.3	20.35	19.1819	1	#NULL!	#NULL!	0	#NULL!	#NULL!	98	0
60076	14.3874	1	1	157.5	34.5	13.9078	1	9.8	4.28968	4.7	5.1	57.15	0	0.362857	38.1	159.85	14.9108	1	8.5	7.86575	0.380982	4.3	5.7	60.5	0	#NULL!	#NULL!	#NULL!	#NULL!	#NULL!	#NULL!	#NULL!	#NULL!	#NULL!	#NULL!	#NULL!	#NULL!	1	#NULL!	#NULL!	#NULL!	#NULL!	#NULL!	#NULL!	#NULL!	#NULL!	#NULL!	92	0
60077	13.5578	1	1	152.2	39.4	17.0085	1	18.6	12.9383	11.6	7	61.95	0	0.40703	44.1	159.4	17.3565	1	10.25	9.76669	0.388959	7.35	6.25	61.55	0	15	0	48.2	168	17.0777	1	7	6	6.1	63.25	0	0.376488	1	13	13.1	12.6921	#NULL!	#NULL!	#NULL!	#NULL!	#NULL!	#NULL!	88	0
60078	14.3956	1	1	170.05	59	20.4032	2	19.9	14.1109	10	9.9	67.8	0	0.398706	#NULL!	#NULL!	#NULL!	#NULL!	#NULL!	#NULL!	#NULL!	#NULL!	#NULL!	#NULL!	#NULL!	16	1	73.45	174.9	24.0111	2	16.1	13.7	13.55	77.3	1	0.441967	1	29.8	29.65	25.5059	1	#NULL!	#NULL!	14	#NULL!	#NULL!	98	0
60079	15.0856	1	1	168.6	45.3	15.9361	1	14.5	9.063	7.7	6.8	60	0	0.355872	#NULL!	#NULL!	#NULL!	#NULL!	#NULL!	#NULL!	#NULL!	#NULL!	#NULL!	#NULL!	#NULL!	#NULL!	#NULL!	#NULL!	#NULL!	#NULL!	#NULL!	#NULL!	#NULL!	#NULL!	#NULL!	#NULL!	#NULL!	1	#NULL!	#NULL!	#NULL!	1	#NULL!	#NULL!	14	#NULL!	#NULL!	88	0
60080	15.4524	1	1	158.9	36.4	14.4163	1	10.1	4.60492	5.2	4.9	57.95	0	0.364695	#NULL!	#NULL!	#NULL!	#NULL!	#NULL!	#NULL!	#NULL!	#NULL!	#NULL!	#NULL!	#NULL!	17	1	43.7	167.3	15.6131	1	5.85	6.2	6.15	59.7	0	0.356844	1	12.05	12	11.588	1	#NULL!	#NULL!	14	#NULL!	#NULL!	106	0
60081	15.1376	1	1	164.9	60.1	22.1021	2	17.9	12.2957	10.7	7.2	67.25	0	0.407823	60.5	166.4	21.8499	2	11.5	6.057	0.400841	6.9	7.1	66.95	0	17	1	58.85	167.55	20.9632	2	8.3	7.6	7.5	66.45	0	0.396598	1	15.9	15.8	15.2687	1	#NULL!	#NULL!	12	#NULL!	#NULL!	108	0
60082	14.1054	1	1	157.5	36.6	14.7543	1	10.9	5.43852	5.6	5.3	54.65	0	0.346984	41	163	15.4315	1	9	3.442	0.360123	5.3	4.7	58.9	0	16	1	49.05	172.6	16.4648	1	5.15	5.8	6.05	63.35	0	0.367034	1	10.95	11.2	10.7653	1	#NULL!	#NULL!	13	#NULL!	#NULL!	100	0
[truncated: 103 more columns]
